# Supplementary material for: Duganella hordei sp. nov., Duganella kodaimurasaki sp. nov., and Duganella rhizosphaerae sp. nov., isolated from barley rhizosphere
Source: Research Square preprint supplement (doi:10.21203/rs.3.rs-6766499/v1), 2025-06-09
Supplement: Supplementary file 1 [file 20a092d0ac7e91fd6f895a50.xlsx]

## Sheet: Sheet1
Supplementary information Antonie van Leeuwenhoek Duganella hordei sp. nov., Duganella kodaimurasaki sp. nov., and Duganella rhizosphaerae sp. nov., isolated from barley rhizosphere Katsumoto Kishiro1, Nurettin Sahin2, Daisuke Saisho1, Naoki Yamaji1, Jun Yamashita1, Yuki Monden3, Tomoyuki Nakagawa4, Keiichi Mochida5,6, Akio Tani1 1 Institute of Plant Science and Resources, Okayama University, Kur…

## Sheet: Table S1
Table S1 Identification of bacterial isolates from barley based on 16S rRNA gene sequencing
Strain	Variety	Part	Top-hit type strain	Similarity %	Accession number
R72	Haruna Nijo	Leaf	Cytobacillus oceanisediminis H2T	98.92	LC807666
R73	Haruna Nijo	Leaf	Cytobacillus oceanisediminis H2T	98.92	LC807667
R102	Hayakiso 2	Leaf	Janibacter melonis CM2104T	99.38	LC807687
R74-2	Haruna Nijo	Leaf	Methylobacterium oryzae CBMB20T	99.15	LC807669
R44	Hayakiso 2	Leaf	Nocardia tengchongensis CFH S0057T	99.1	LC807642
R66	Hayakiso 2	Leaf	Paenibacillus xylanivorans A59T	99.32	LC807663
R14-1	Haruna Nijo	Leaf	Priestia megaterium NBRC 15308T	99.86	LC807604
R14-3	Haruna Nijo	Leaf	Priestia megaterium NBRC 15308T	100	LC807605
R38	Hayakiso 2	Leaf	Priestia megaterium NBRC 15308T	100	LC807638
R74-1	Haruna Nijo	Leaf	Pseudomonas cyclaminis MAFF 301449T	99.72	LC807668
R67	Hayakiso 2	Leaf	Rhodococcus fascians LMG 3623T	99.86	LC807664
R77	Hayakiso 2	Leaf	Rhodococcus fascians LMG 3623T	99.93	LC807672
R42	Hayakiso 2	Leaf	Staphylococcus caprae ATCC 35538T	99.93	LC807641
R103	Haruna Nijo	Leaf	Staphylococcus epidermidis NCTC 11047T	99.93	LC807688
R39-1	Hayakiso 2	Leaf	Staphylococcus epidermidis NCTC 11047T	99.93	LC807639
R39-2	Hayakiso 2	Leaf	Staphylococcus epidermidis NCTC 11047T	99.93	LC807640
R15	Haruna Nijo	Leaf	Staphylococcus hominis subsp. hominis DSM 20328T	99.52	LC807606
R17-1	Haruna Nijo	Leaf	Staphylococcus warneri ATCC 27836T	99.93	LC807607
R17-2	Haruna Nijo	Leaf	Staphylococcus warneri ATCC 27836T	99.93	LC807608
R18	Haruna Nijo	Leaf	Staphylococcus warneri ATCC 27836T	99.86	LC807609
R79	Haruna Nijo	Stem	Bacillus mobilis 0711P9-1T	99.93	LC807673
R12	Haruna Nijo	Stem	Curtobacterium luteum DSM 20542T	99.93	LC807602
R59-2	Haruna Nijo	Stem	Duganella violaceipulchra HSC-15S17T	99.52	LC807658
R13	Haruna Nijo	Stem	Paenarthrobacter aromaticivorans MMS21-TAE1-1T	99.65	LC807603
R94	Haruna Nijo	Stem	Pseudarthrobacter defluvii 4C1-aT	99.31	LC807685
R60-1	Haruna Nijo	Stem	Pseudarthrobacter defluvii 4C1-aT	99.38	LC807659
R29	Hayakiso 2	Stem	Pseudomonas coleopterorum Esc2AmT	99.58	LC807626
R45	Haruna Nijo	Stem	Pseudomonas paraglycinae BML-PP023T	100	LC807643
R28	Hayakiso 2	Stem	Pseudomonas viridiflava DSM 6694T	99.79	LC807625
R11	Haruna Nijo	Stem	Staphylococcus epidermidis NCTC 11047T	99.66	LC807601
R31	Hayakiso 2	Stem	Staphylococcus epidermidis NCTC 11047T	100	LC807627
R33-1	Hayakiso 2	Stem	Staphylococcus epidermidis NCTC 11047T	99.93	LC807630
R33-2	Hayakiso 2	Stem	Staphylococcus epidermidis NCTC 11047T	99.93	LC807631
R36-1	Hayakiso 2	Stem	Staphylococcus epidermidis NCTC 11047T	99.93	LC807635
R10-1	Haruna Nijo	Stem	Staphylococcus warneri ATCC 27836T	100	LC807599
R10-2	Haruna Nijo	Stem	Staphylococcus warneri ATCC 27836T	99.45	LC807600
R32-1	Hayakiso 2	Stem	Staphylococcus warneri ATCC 27836T	99.93	LC807628
R32-2	Hayakiso 2	Stem	Staphylococcus warneri ATCC 27836T	99.86	LC807629
R35-1	Hayakiso 2	Stem	Staphylococcus warneri ATCC 27836T	99.93	LC807633
R35-2	Hayakiso 2	Stem	Staphylococcus warneri ATCC 27836T	99.86	LC807634
R37-2	Hayakiso 2	Stem	Staphylococcus warneri ATCC 27836T	99.93	LC807637
R34	Hayakiso 2	Stem	Staphylococcus warneri ATCC 27836T	99.73	LC807632
R37-1	Hayakiso 2	Stem	Staphylococcus warneri ATCC 27836T	99.93	LC807636
R59-1	Haruna Nijo	Stem	Staphylococcus warneri ATCC 27836T	100	LC807657
R61	Haruna Nijo	Stem	Streptacidiphilus carbonis DSM 41754T	99.03	LC807660
R2	Hayakiso 2	Root	Arthrobacter nitrophenolicus SJConT	99.1	LC807591
R46	Haruna Nijo	Root	Bacillus paramobilis BML-BC017T	100	LC807644
R51	Hayakiso 2	Root	Bacillus paramobilis BML-BC017T	100	LC807647
R49	Hayakiso 2	Root	Bacillus toyonensis BCT-7112T	100	LC807646
R8	Haruna Nijo	Root	Chryseobacterium shigense DSM 17126T	99.51	LC807596
R24	Hayakiso 2	Root	Chryseobacterium shigense DSM 17126T	99.44	LC807618
R1	Haruna Nijo	Root	Duganella violaceipulchra HSC-15S17 T	99.1	LC807588
R53-1	Haruna Nijo	Root	Duganella violaceipulchra HSC-15S17T	98.97	LC807650
R54-1-2-1	Haruna Nijo	Root	Duganella violaceipulchra HSC-15S17T	99.52	LC807652
R64	Hayakiso 2	Root	Duganella violaceipulchra HSC-15S17T	99.86	LC807590
R52-1	Haruna Nijo	Root	Duganella vulcania FT81WT	99.52	LC807648
R55	Haruna Nijo	Root	Duganella vulcania FT81WT	99.31	LC807655
R56	Haruna Nijo	Root	Duganella vulcania FT81WT	99.52	LC807656
R81-1	Haruna Nijo	Root	Duganella vulcania FT81WT	99.52	LC807674
R83	Haruna Nijo	Root	Duganella vulcania FT81WT	99.52	LC807676
R84	Hayakiso 2	Root	Duganella vulcania FT81WT	99.72	LC807677
R86-1	Haruna Nijo	Root	Duganella vulcania FT81WT	99.52	LC807678
R57	Haruna Nijo	Root	Duganella vulcania FT81WT	99.45	LC807589
R63	Hayakiso 2	Root	Duganella vulcania FT81WT	99.52	LC807662
R104	Haruna Nijo	Root	Dyella koreensis BB4T	100	LC807689
R26-1	Hayakiso 2	Root	Dyella koreensis BB4T	99.79	LC807622
R26-2	Hayakiso 2	Root	Dyella koreensis BB4T	99.93	LC807623
R27	Hayakiso 2	Root	Dyella koreensis BB4T	99.86	LC807624
R91	Haruna Nijo	Root	Flavobacterium johnsoniae subsp. aurantiacum DSM 6792T	99.58	LC807682
R92-1	Haruna Nijo	Root	Flavobacterium johnsoniae subsp. aurantiacum DSM 6792T	99.37	LC807683
R92-2	Haruna Nijo	Root	Flavobacterium johnsoniae subsp. aurantiacum DSM 6792T	99.58	LC807684
R97	Hayakiso 2	Root	Flavobacterium johnsoniae subsp. aurantiacum DSM 6792T	98.4	LC807686
R54-2	Haruna Nijo	Root	Herbaspirillum hiltneri N3T	99.93	LC807654
R90	Haruna Nijo	Root	Herbaspirillum hiltneri N3T	99.86	LC807681
R54-1-2-2	Haruna Nijo	Root	Herbaspirillum hiltneri N3T	99.72	LC807653
R106	Hayakiso 2	Root	Mycobacterium aubagnense CIP 108543T	98.96	LC807690
R9-2	Haruna Nijo	Root	Paenarthrobacter aromaticivorans MMS21-TAE1-1T	99.72	LC807597
R9-3	Haruna Nijo	Root	Paenarthrobacter aromaticivorans MMS21-TAE1-1T	99.72	LC807598
R76-1	Hayakiso 2	Root	Paenibacillus pabuli NBRC 13638T	99.32	LC807671
R81-2	Haruna Nijo	Root	Pandoraea cepalis LMG 31106T	99.93	LC807675
R86-2	Haruna Nijo	Root	Pandoraea cepalis LMG 31106T	99.79	LC807679
R21-1	Hayakiso 2	Root	Priestia aryabhattai B8W22T	100	LC807614
R19-1	Hayakiso 2	Root	Priestia aryabhattai B8W22T	100	LC807610
R19-2	Hayakiso 2	Root	Priestia megaterium NBRC 15308T	99.86	LC807611
R21-3	Hayakiso 2	Root	Priestia megaterium NBRC 15308T	99.93	LC807615
R25-1	Hayakiso 2	Root	Priestia megaterium NBRC 15308T	100	LC807619
R25-2	Hayakiso 2	Root	Priestia megaterium NBRC 15308T	100	LC807620
R25-3	Hayakiso 2	Root	Priestia megaterium NBRC 15308T	99.93	LC807621
R5-2	Haruna Nijo	Root	Priestia megaterium NBRC 15308T	100	LC807592
R5-3	Haruna Nijo	Root	Priestia megaterium NBRC 15308T	100	LC807593
R19-3	Hayakiso 2	Root	Priestia megaterium NBRC 15308T	99.93	LC807612
R23	Hayakiso 2	Root	Pseudarthrobacter chlorophenolicus A6T	98.82	LC807617
R22	Hayakiso 2	Root	Pseudarthrobacter defluvii 4C1-aT	99.31	LC807616
R70	Haruna Nijo	Root	Pseudomonas cyclaminis MAFF 301449T	99.72	LC807665
R48	Hayakiso 2	Root	Pseudomonas farris SWRI79T	99.66	LC807645
R75	Hayakiso 2	Root	Pseudomonas farris SWRI79T	99.66	LC807670
R7	Haruna Nijo	Root	Pseudomonas petroselini MAFF 311094T	99.73	LC807595
R20	Hayakiso 2	Root	Pseudomonas rhodesiae CIP 104664T	99.25	LC807613
R6	Haruna Nijo	Root	Pseudomonas rhodesiae CIP 104664T	99.38	LC807594
R53-2	Haruna Nijo	Root	Rugamonas rubra ATCC 43154T	98.97	LC807651
R87	Haruna Nijo	Root	Staphylococcus hominis subsp. hominis DSM 20328T	99.8	LC807680
R62	Hayakiso 2	Root	Terrabacter aerolatus 5516J-36T	99.07	LC807661
R52-2	Haruna Nijo	Root	Williamsia muralis DSM 44343T	100	LC807649
Bacterial strains were isolated from the leaf, stem, and root of barley plants. Identification was conducted by comparing 16S rRNA gene sequences to reference strains in the EZBioCloud database.
The closest type strains and their sequence similarity % are listed.

## Sheet: Table S2
Table S2 16S rRNA gene sequence similarity among R1T, R57T, R64T, and their relatives
	Species	Accession No.	1	2	3	4	5	6	7	8	9	10	11	12	13	14	15	16	17	18	19	20	21	22	23	24	25	26	27	28	29	30	31	32	33	34	35	36	37	38	39	40	41	42	43	44	45	46	47
1	Massilia alkalitolerans YIM 31775T	AY679161	100
2	Massilia varians CCUG 35299T	AM774587	98.16	100
3	Massilia agri K-3-1T	KX672812	97.47	98.16	100
4	Massilia neuiana PTW21T	KX066866	96.76	97.57	98.43	100
5	Massilia phyllostachyos' G4R7T	MZ573411	96.88	97.5	98.48	98.55	100
6	Massilia yuzhufengensis Y1243-1T	JQ409016	96.75	97.13	98.14	98.14	98.34	100
7	Massilia consociata CCM 7792T	MT760179	96.38	97.2	98.08	97.94	97.79	97.49	100
8	Pseudoduganella rivuli FT92WT	MN548381	96.18	96.4	96.52	97.22	96.38	96.34	96.68	100
9	Pseudoduganella ginsengisoli KCTC 42409T	KJ186108	95.5	95.89	95.4	96.15	95.8	95.38	95.14	98.37	100
10	Duganella flavida FT135WT	MN865820	95.31	95.44	95.22	95.24	95.07	94.96	95.06	96.78	96.25	100
11	Duganella sacchari Sac-22T	EU672806	95.58	95.96	95.44	95.29	95.58	95.07	95.65	97.29	96.94	97.94	100
12	Duganella callida DN04T	MN736119	95.38	95.53	95.47	95.75	95.81	95.01	95.38	98.05	97.75	97.69	98.43	100
13	Duganella guangzhouensis FT80WT	MN548380	95.77	96.1	96.31	96.54	96.38	95.79	95.43	98.33	98.02	96.98	97.72	98.34	100
14	Duganella lactea FT50WT	MN865818	95.77	95.81	95.9	95.92	95.5	95.3	95.79	97.72	96.86	98.13	98.08	98.12	98.26	100
15	Duganella dendranthematis AF9R3T	MT012222	94.91	95.1	95.2	95.41	95.38	95.1	95.48	96.79	95.96	97.61	97.85	97.39	97.31	98.35	100
16	Duganella levis CY42WT	MN865814	95.84	95.74	95.9	96.13	96.01	95.58	95.8	97.39	96.46	97.25	97.43	97.69	97.86	98.19	98.88	100
17	Janthinobacterium fluminis hw3T	ON668161	95.6	95.37	96.02	95.88	95.87	95.86	95.8	96.84	95.67	97.11	96.5	96.49	96.64	97.04	97.44	98.15	100
18	Janthinobacterium lividum DSMZ 1522T	MN307292	95.35	95.29	95.97	95.92	96.3	95.58	95.58	96.36	95.36	96.56	96.22	96.15	96.43	96.56	97.23	97.78	98.56	100
19	Janthinobacterium kumbetense' GKT	MZ434955	94.89	94.94	95.49	95.48	95.99	95.18	95.25	96.01	95.04	96.3	96.14	96.01	96.15	96.29	97.22	97.49	98.15	99.7	100
20	Janthinobacterium rivuli FT68WT	MN548379	95.24	95.15	95.63	95.93	96.3	95.24	95.28	96.12	95.36	96.31	95.86	96.17	96.58	96.44	96.93	97.66	98.22	99.6	99.56	100
21	Janthinobacterium tructae' SNU WT3T	MN524134	95.51	95.22	95.86	95.72	96.16	95.51	95.36	96.21	95.38	96.27	96.01	95.97	96.41	96.41	96.99	97.87	98.48	99.66	99.48	99.59	100
22	Janthinobacterium svalbardensis' JA-1T	DQ355146	95.42	95.29	95.79	95.64	96.23	95.42	95.43	96.14	95.29	96.28	96.33	95.98	96.36	96.35	96.94	97.86	98.5	99.64	99.47	99.57	100	100
23	Janthinobacterium aquaticum FT58WT	MN548378	95.77	95.51	96.25	95.86	96.3	95.86	95.8	96.45	95.43	96.31	96.22	96.17	96.65	96.78	97.16	97.79	98.7	99.33	99.48	99.33	99.52	99.5	100
24	Janthinobacterium violaceinigrum FT13WT	MK968136	95.7	95.66	96.38	95.79	96.3	95.86	95.8	96.38	95.43	96.24	96.22	96.17	96.71	96.71	97.08	97.66	98.63	99.33	99.26	99.06	99.31	99.29	99.73	100
25	Janthinobacterium agaricidamnosum W1r3T	Y08845	95.77	95.88	96.44	96.04	96.37	95.92	96.24	96.45	95.39	96.17	96.15	95.96	96.52	96.45	97.06	97.68	98.49	99.11	98.96	98.84	98.97	98.93	99.25	99.25	100
26	Janthinobacterium psychrotolerans' S3-2T	LOCQ01000055	95.53	95.51	96.31	96.36	96.38	95.79	95.95	96.58	95.57	96.65	96.29	96.4	96.78	96.91	97.31	97.99	98.36	99.39	99.34	99.13	99.17	99.22	99.13	99.13	99.25	100
27	Rugamonas brunnea LX20WT	MT786440	96.11	96.25	96.93	97.22	97.03	96.89	96.17	97.39	96.46	96.78	96.5	96.68	97.52	96.98	96.78	97.39	97.8	98.11	97.93	97.86	98	98	97.92	97.99	98.16	98.59	100
28	Rugamonas fusca FT3ST	MT786439	96.18	96.25	96.93	96.95	97.03	96.69	95.95	97.39	96.39	96.71	96.43	96.61	97.59	96.98	96.78	97.25	97.94	98.25	98.15	98.12	98.28	98.21	98.33	98.39	98.16	98.33	99.6	100
29	Rugamonas apoptosis LX47WT	MT786441	96.38	96.54	97.13	97.28	96.96	96.83	96.17	97.52	96.59	96.78	96.5	96.53	97.72	97.18	97.08	97.52	97.67	97.85	97.63	97.59	97.86	97.86	97.79	97.85	97.82	98.19	99.46	99.46	100
30	Massilia rubra ATCC 43154T	HM038005	94.9	95.22	95.9	96.17	96.01	95.74	95.5	96.9	96.48	96.01	96.22	96.31	97.04	96.49	96.85	97.59	98.05	97.86	97.7	97.59	98.12	98.21	97.59	97.52	97.35	97.66	98.14	98.28	98	100
31	Duganella sp. R1T	LC807588	95.58	95.81	96	96.76	96.45	95.79	95.65	97.66	97.38	96.41	96.5	96.92	97.93	97.31	97.22	97.93	97.31	97.45	97.19	97.45	97.45	97.43	97.17	97.17	97.1	97.59	98.48	98.35	98.62	98.82	100
32	Rugamonas violacea P5900T	MT984570	95.62	95.8	96.27	96.87	96.2	96.3	95.93	97.56	97.1	96.3	96.47	96.53	97.83	97.06	97.44	97.97	97.74	97.76	97.56	97.62	97.73	97.75	97.62	97.48	97.47	97.85	98.25	98.18	98.25	99.21	99.08	100
33	Duganella sp. R64T	LC807590	95.24	95.15	95.93	96.21	95.94	96	95.5	97.24	96.76	96.48	96.29	96.41	97.45	96.89	97.52	97.86	97.66	97.79	97.56	97.52	97.66	97.64	97.52	97.45	97.52	97.93	98.21	98.14	98.07	98.82	98.97	99.36	100
34	Duganella violaceipulchra HSC–15S17T	MT579559	95.46	95.29	96.11	96.43	96.09	96.14	95.65	97.45	96.93	96.71	96.43	96.54	97.66	97.11	97.23	97.72	97.53	97.58	97.41	97.39	97.52	97.5	97.45	97.38	97.41	97.91	98.39	98.33	98.26	98.49	99.1	99.24	99.86	100
35	Duganella aquatica' FT103WT	MN548382	95.84	95.81	96.59	96.88	96.45	96.62	96.17	97.72	97.21	96.58	96.65	96.9	98.06	97.52	97.76	98.26	97.6	97.44	97.19	97.25	97.31	97.29	97.45	97.38	97.41	97.59	98.12	98.06	98.12	98.35	98.9	99.3	99.38	99.46	100
36	Duganella aquatica' FT29WT	MK968139	95.76	95.66	96.51	96.73	96.52	96.47	96.09	97.72	97.27	96.84	96.57	96.96	98.05	97.58	97.75	98.12	97.8	97.7	97.48	97.58	97.58	97.49	97.85	97.78	97.74	97.78	98.52	98.59	98.32	98.41	98.83	98.81	98.9	99.06	99.53	100
37	Duganella phyllosphaerae CCM 7824T	MT760182	95.36	95.5	95.88	96.1	96.1	96.1	95.72	96.84	96.76	96.84	97.13	96.45	96.99	96.47	97.28	97.43	96.99	96.69	96.49	96.47	96.54	96.62	96.62	96.62	96.62	96.84	97.79	97.79	97.94	97.94	98.09	98.16	98.38	98.53	98.46	98.31	100
38	Duganella zoogloeoides IAM 12670T	AB681807	95.38	95.44	95.8	96.35	96.45	95.86	95.58	96.83	96.76	96.83	96.43	96.7	97.32	96.62	97.29	97.45	96.83	96.77	96.52	96.9	96.62	96.64	96.56	96.56	96.49	96.9	97.73	97.8	97.94	97.98	98.34	98.09	98.28	98.42	98.35	98.28	99.41	100
39	Duganella aceris' SAP-35T	MN737197	94.99	95.15	95.95	96.57	95.8	95.99	95.5	97.05	96.83	96.16	96.22	96.03	97.4	96.77	96.83	97.12	96.83	97.05	96.73	96.78	96.75	96.71	96.71	96.71	96.71	97.19	97.88	97.81	98.01	98.25	98.76	98.94	99.1	99.25	98.9	98.42	97.94	97.93	100
40	Duganella vulcania FT81WT	MN865810	94.9	95.22	96.11	96.54	96.16	95.86	95.65	97.45	96.73	96.51	96.65	96.82	97.92	97.38	97.08	97.72	97.39	97.37	97.12	97.25	97.17	97.14	97.19	97.25	97.2	97.86	98.59	98.46	98.33	98.14	98.48	98.18	98.14	98.26	98.12	98.32	97.65	97.66	98.77	100
41	Duganella sp. R57T	LC807589	95.17	95.37	96.21	96.49	96.3	96	95.5	97.73	97.04	96.34	96.72	96.78	97.93	97.24	97.29	97.66	97.52	97.52	97.19	97.17	97.31	97.21	97.45	97.59	97.38	97.45	98.35	98.48	98.21	98.12	98.35	98.08	98	98.14	98.21	98.48	97.5	97.38	98.62	99.45	100
42	Duganella margarita FT109WT	MN865815	95.31	95.15	95.9	96.67	96.3	95.86	95.65	97.19	96.59	96.38	96.43	97.04	97.79	97.38	97.91	98.53	96.98	97.04	96.67	97.05	96.83	96.71	96.92	96.78	96.79	96.99	97.19	97.19	97.32	97.32	98.07	97.9	97.86	97.72	98.26	98.19	97.13	97.52	98.08	98.19	98.41	100
43	Pseudoduganella namucuonensis CGMCC 1.11014T	JF799985	95.36	96.03	97.06	97.21	97.1	96.96	96.24	96.58	96.11	95.9	95.51	96.03	96.44	96.84	96.56	96.58	96.5	96.76	96.23	96.51	96.34	96.29	96.51	96.71	96.52	96.71	97.58	97.58	97.65	96.35	96.83	96.92	96.69	96.78	97.18	97.38	96.54	96.63	97.19	97.52	97.66	97.18	100
44	Massilia soli R798T	MT950109	96.09	96.18	97.2	97.01	97.03	97.1	96.54	96.64	96.18	95.69	96.15	95.87	96.7	96.09	96.11	96.7	96.98	97.37	96.97	97.11	97.24	97.14	97.38	97.31	97.34	97.04	97.71	97.71	97.58	97.1	97.11	97.13	97.11	97.17	97.44	97.64	96.99	96.7	97.67	97.78	98.21	97.38	97.84	100
45	Massilia agrisoli MAHUQ-52T	MT514500	95.75	96.4	97.32	97.25	96.96	96.69	96.54	96.71	95.89	95.48	95.65	95.41	96.24	95.54	95.14	95.96	96.63	97.26	96.75	96.92	97.03	97	96.92	97.06	97.24	97.26	97.81	97.81	97.88	96.88	96.83	96.81	96.49	96.58	96.58	96.77	96.76	96.49	97.31	97.74	97.73	96.44	97.33	98.63	100
46	Massilia polaris RP-1-19T	MN685328	95.05	95.37	96.16	96.29	97.03	96.48	95.87	95.54	95.13	94.78	95.29	95.18	95.54	94.91	94.97	95.27	96.15	96.71	96.67	96.71	97.17	97.29	96.71	96.57	96.77	96.36	96.64	96.91	96.64	96.18	96.35	96.18	96.07	95.82	96.02	96.36	96.18	96.01	96.69	96.43	97.38	96.3	96.71	98.01	97.87	100
47	Pseudoduganella violaceinigra DSM 15887T	KF267246	95.86	95.88	96.55	96.97	96.88	96.89	95.8	96.63	96.01	96.07	95.79	96.34	96.83	96.28	96.54	96.76	97.59	97.66	97.56	97.66	97.65	97.57	97.79	97.66	97.44	97.31	98.21	98.48	98.21	97.63	97.52	97.38	97.1	97.24	97.45	97.79	96.99	97.17	97.03	97.17	97.59	96.9	96.9	97.93	97.24	98.35	100
48	Massilia aquatica CCM 8693T	MN612031	96.11	96.1	96.79	97.24	96.95	97.1	96.02	96.65	96.11	96.25	95.87	96.46	97.12	96.45	96.34	96.85	97.53	97.51	97.34	97.45	97.45	97.36	97.65	97.72	97.68	97.76	98.59	98.59	98.46	97.38	97.59	97.5	97.17	97.43	97.52	97.92	97.06	97.25	97.12	97.52	97.66	96.98	97.04	97.78	97.26	97.8	99.66
49	Massilia frigida CCM 8695T	MN612047	96.23	96.24	96.85	97.23	97.09	97.09	96.01	96.78	96.31	96.44	96.07	96.67	97.18	96.57	96.55	97.04	97.66	97.64	97.48	97.58	97.58	97.49	97.78	97.85	97.74	97.75	98.59	98.72	98.59	97.52	97.72	97.57	97.24	97.49	97.58	97.98	97.28	97.45	97.18	97.52	97.79	97.11	97.24	97.91	97.39	97.94	99.79
50	Massilia antarctica CCM 8941T	OM243916	96.05	96.1	96.79	97.1	96.95	96.96	95.87	96.78	96.11	96.25	95.87	96.4	97.12	96.45	96.34	96.85	97.66	97.64	97.48	97.59	97.58	97.5	97.79	97.85	97.68	97.58	98.46	98.73	98.46	97.52	97.59	97.5	97.17	97.38	97.52	97.92	97.06	97.25	97.12	97.39	97.79	96.98	97.04	97.78	97.4	97.94	99.79
51	Massilia rubra CCM 8692T	MN611986	96.1	96.1	96.79	97.1	96.95	96.96	95.87	96.78	96.11	96.24	95.86	96.46	97.12	96.44	96.41	96.85	97.66	97.64	97.48	97.59	97.58	97.5	97.79	97.85	97.68	97.62	98.46	98.73	98.46	97.52	97.58	97.5	97.17	97.43	97.52	97.92	97.05	97.24	97.12	97.38	97.79	96.98	97.04	97.78	97.4	97.94	99.86
52	Massilia mucilaginosa CCM 8733T	MN612043	96.42	96.46	97.05	97.43	97.31	97.23	96.23	96.98	96.44	96.57	96.21	96.81	97.38	96.77	96.55	97.18	97.86	97.7	97.55	97.65	97.65	97.56	97.85	97.91	97.81	97.95	98.72	98.79	98.72	97.72	97.85	97.77	97.44	97.68	97.78	98.04	97.42	97.58	97.38	97.71	97.85	97.18	97.3	97.91	97.59	97.93	99.79
53	Massilia atriviolacea SODT	MH551481	95.83	95.95	96.86	97.21	97.02	96.96	96.24	96.71	96.11	96.03	95.72	96.6	96.91	96.37	96.18	96.77	97.66	97.43	97.19	97.24	97.31	97.28	97.45	97.65	97.61	97.78	98.52	98.39	98.25	97.52	97.58	97.41	97.17	97.31	97.31	97.57	96.91	97.11	97.05	97.65	97.58	96.71	97.18	97.64	97.33	97.53	99.31
54	Massilia glaciei B448-2T	KJ755877	95.58	95.59	96.04	96.47	96.3	96.27	95.28	95.98	95.92	95.45	95.17	95.75	96.18	95.71	95.52	96.25	96.92	96.77	96.53	96.65	96.76	96.72	96.85	96.99	96.73	96.72	97.65	97.65	97.65	97.32	97.73	97.21	96.97	96.99	97.18	97.58	96.84	97.11	96.92	96.58	96.83	96.38	96.44	97.04	96.58	97.12	98.9
55	Massilia eurypsychrophila B528-3T	KJ361504	94.69	95.59	95.39	95.67	96.38	95.6	95.36	94.98	94.77	94.55	95.21	94.76	95.46	94.69	94.84	95.12	95.81	95.67	95.45	95.53	95.53	96.29	95.67	95.81	95.88	95.74	96.65	96.72	96.65	96.21	95.81	96.57	95.95	96.09	96.02	96.01	96.32	95.81	96.72	96.51	96.65	95.95	96.23	97.14	96.58	97.49	97.7
56	Massilia psychrophila B1555-1T	KM873051	95.12	95.44	95.9	95.83	95.87	96.53	95.28	95.62	95.27	94.55	95.22	94.85	95.97	95.4	95.47	95.69	96.04	95.76	95.62	95.55	95.69	95.91	96.04	96.18	96.18	95.97	97.03	97.1	96.89	96.52	96.25	96.78	96.61	96.75	96.82	96.88	96.54	96.18	97.31	97.1	97.03	96.4	96.82	97.46	96.96	96.96	96.96
57	Massilia niabensis 5420S-26T	EU808006	95.47	96.17	96.48	96.98	96.74	97.2	95.42	95.83	95.26	94.9	94.89	94.91	95.83	95.11	94.62	95.47	95.47	95.69	95.16	95.47	95.91	95.97	95.4	95.55	95.61	95.91	97.34	97.05	97.27	96.19	96.19	96.22	95.62	95.76	95.98	96.26	95.66	95.61	96.41	96.98	96.77	95.98	96.84	97.27	97.77	97.34	96.84
58	Massilia jejuensis 5317J-18T	FJ969486	95.76	96.69	96.34	96.92	96.95	96.99	95.65	96.2	95.48	95.48	95.19	95.33	96.06	95.33	95.12	95.84	96.56	96.42	96.12	96.34	96.49	96.53	96.34	96.2	96.56	96.27	97.35	97.35	97.35	96.7	96.63	96.55	96.13	96.27	96.34	96.55	96.47	96.27	96.13	96.42	96.56	95.48	96.13	97.56	97.63	97.28	97.78
59	Massilia brevitalea byr23-80T	EF546777	94.96	96.4	95.84	96.18	96.68	96.4	95.65	95.58	94.54	94.61	95.29	95.19	95.24	94.75	95.21	94.96	95.98	95.65	96.08	95.45	95.69	96.36	95.79	95.65	96.04	95.45	96.55	96.48	96.48	95.98	95.84	95.71	95.42	95.45	95.65	95.92	96.1	95.21	95.41	95.58	96.11	94.76	95.51	96.76	96.69	96.47	97.22
60	Massilia suwonensis 5414S-25T	FJ969487	96.67	97.5	96.95	97.02	96.37	97.02	96.31	96.6	95.75	96.03	96.06	95.78	95.89	95.81	95.43	95.89	96.31	96.38	95.88	96.03	96.31	96.35	96.24	96.38	96.38	96.6	97.45	97.23	97.45	96.09	96.24	96.39	95.82	95.96	96.17	96.45	96.02	95.74	95.96	96.45	96.31	95.39	96.45	97.09	97.59	97.02	97.09
61	haematophila CCM 7480T	MT758009	97.05	98.15	97.57	97.2	96.83	96.53	96.52	96.32	95.66	96.31	95.87	95.92	95.94	96.09	95.42	95.43	95.43	96.24	95.94	96.02	95.94	96.01	95.87	96.02	96.24	96.61	96.98	96.76	96.9	95.65	95.87	95.86	95.35	95.5	95.72	96.16	95.5	95.58	95.43	95.94	95.65	94.91	96.09	96.09	96.9	96.39	96.61
62	Massilia terrae J11T	KU870757	94.35	96.48	95.9	95.13	96.01	95.79	96.09	95.48	95.9	94.53	95.37	95.56	94.53	94.19	94.4	94.13	95.13	94.26	94.75	94.06	95.38	95.36	94.26	94.46	95.16	94.21	95.14	95.14	95.34	95.01	95.66	94.85	95.04	93.94	94.26	94.59	95.59	95.32	95.41	94.94	95.93	94.13	95.53	95.14	96.51	96.02	95.87
63	Massilia solisilvae J18T	KU870758	95.35	96.55	96.99	95.59	96.23	96.55	96.53	96.7	96.18	95.07	95.51	95.93	95.48	95.2	95.14	95.27	95.95	95.54	95.41	95.07	95.79	95.71	95.34	95.67	95.9	95.49	96.22	96.08	96.35	95.78	96.14	95.6	95.93	95.35	95.68	95.6	95.66	95.59	96.02	95.95	96.28	95.41	96.48	96.15	96.99	95.95	96
64	Massilia agilis J9T	KU870756	94.09	96.62	97.06	95.82	96.3	96.69	96.61	97.09	96.1	95.12	95.51	96.06	95.87	95.46	95.05	95.33	95.74	95.53	95.19	95.12	95.59	95.5	95.46	95.66	95.7	94.29	96.48	96.34	96.75	95.9	96.21	95.55	95.73	94.22	95.73	95.66	95.44	95.39	96.09	96.27	96.35	95.46	96.27	96.14	97.25	95.82	96.01
65	Massilia chloroacetimidivorans TA-C7eT	KT963079	96.44	96.77	97.74	96.7	96.81	97.38	96.9	96.86	95.49	95.35	95.37	95.7	95.96	95.55	94.91	95.55	95.67	96.17	95.71	95.82	96.07	96	96.17	96.3	96.42	96.51	96.78	96.65	96.85	95.7	95.8	95.97	95.73	95.89	96.1	96.02	95.59	95.53	95.73	95.89	95.73	95.41	96.17	96.71	97.33	96.43	96.49
66	Massilia tieshanensis TS3T	HM130516	95.93	96.84	98.07	98.14	97.61	97.17	97.49	96.62	95.66	94.97	95.22	95.38	96.14	95.38	95.03	95.73	95.79	96.07	95.78	96	96.27	96.14	96.21	96.07	96.2	96	96.76	96.9	97.04	96.24	96.55	96.88	96.21	96.35	96.55	96.55	95.81	95.72	96.47	96.28	96.41	96	96.62	96.83	97.17	96.42	96.62
67	Massilia niastensis 5516S-1T	EU808005	95.68	96.98	97.63	98.49	97.97	97.27	97.2	96.41	95.83	94.97	95.19	95.28	96.48	95.18	94.92	95.55	95.4	96.05	95.68	95.98	96.12	96.18	95.83	95.98	96.19	96.41	97.2	97.13	97.41	96.26	96.62	96.74	96.19	96.34	96.55	96.47	95.88	95.9	96.41	96.48	96.26	96.05	96.77	96.26	97.05	96.55	96.48
68	Massilia aerilata 5516S-11T	EF688526	95.36	96.47	97.43	97.57	97.11	96.79	96.83	95.86	94.94	94.86	94.64	95	95.79	95.29	94.48	95.01	95.29	95.22	94.8	95.08	95.08	95.12	95.22	95.22	95.57	95.44	96.08	95.93	96.36	95.5	96.15	95.74	95.44	95.58	95.79	95.71	94.85	95.15	95.79	95.72	95.79	95.72	95.93	95.72	95.93	96.5	96.43
69	Massilia pinisoli T33T	KU296190	94.52	96.39	96.64	97.06	97.1	96.82	97.05	95.56	94.98	94.6	94.65	95.23	95.15	94.53	94.8	94.6	95.25	95.15	95.55	94.94	95.72	95.78	94.87	94.87	95.14	95.35	96.1	95.97	96.31	96.16	96.41	95.57	95.93	95.42	95.35	95.41	95.66	95.45	95.68	95.63	96.13	94.94	95.9	95.42	96.62	96.01	96.27
70	Massilia arvi THG-RS2OT	KJ810584	95.69	97.06	97.53	97.6	96.88	96.4	96.83	96.47	95.7	95.42	94.86	95.55	96.05	95.55	94.81	95.28	95.2	95.63	95.2	95.42	95.42	95.42	95.2	95.2	95.62	95.84	96.61	96.33	96.54	95.76	96.4	96.55	95.91	96.05	96.12	96.11	95.36	95.41	95.84	95.84	95.7	95.42	96.61	95.49	96.12	95.7	95.84
71	Massilia rhizosphaerae NEAU GH312T	MW198488	95.78	96.91	97.27	96.83	96.73	96.34	96.09	96.45	95.7	95.71	94.93	95.45	96.58	95.9	94.99	95.37	95.46	95.82	95.41	95.57	95.51	95.42	95.57	95.63	95.9	96.25	96.78	96.71	96.85	95.52	96.14	96.46	95.93	96.25	96.18	96.37	95.29	95.39	95.88	96.04	96	95.24	96.71	95.62	96.37	95.12	95.87
72	Massilia kyonggiensis TSA1T	KC574383	95.71	97.42	98	97.36	97.39	96.43	96.45	95.86	95	95.15	94.7	94.97	95.86	95.29	94.68	94.65	94.79	95.5	95.22	95.15	95.15	95.32	95.07	95.22	95.57	95.65	96.36	96.29	96.43	95.28	95.65	96.04	95.43	95.57	95.65	95.64	94.99	94.93	95.65	95.65	95.57	94.93	96.72	95.5	96.29	95.65	95.64
73	Massilia norwichensis NS9T	HG798294	95.36	96.98	97.22	96.72	96.81	95.86	96.09	95.79	95.72	95.72	95.21	95.44	95.72	95.36	95.09	95.15	94.94	95.51	95.09	95.15	95.15	95.19	95.08	95.22	95.44	95.72	96.44	96.36	96.44	95.43	95.87	96.18	95.58	95.72	95.79	95.93	95.58	95.44	95.79	96.01	95.94	95.15	96.79	95.65	96.44	95.65	95.58
74	Massilia putida 6NM-7T	JQ608336	94.78	96.39	96.58	96.71	96.88	95.79	96.31	96.28	95.36	95.73	95.01	95.59	95.8	95.46	95.28	95.46	95.47	95.85	95.48	95.53	95.51	95.71	95.4	95.53	95.81	96.01	96.75	96.68	96.68	95.73	96.21	96.4	95.79	96.01	96.01	96.27	95.81	95.66	95.74	96.01	96	95.26	97.09	95.86	96.58	95.4	95.93
75	Massilia phosphatilytica 12-OD1T	KU647206	95.09	96.61	96.57	97.13	96.95	96.22	95.72	96.15	95.31	95.87	95.21	95.57	95.66	95.52	95.38	95.38	95.59	96.01	95.53	95.66	95.66	95.85	95.45	95.45	95.52	95.94	96.99	96.92	96.92	95.86	96.15	96.56	95.8	95.94	96.01	96.28	95.73	95.66	95.73	96.01	96.01	95.24	97.27	96.08	96.5	96.08	96.36
76	Massilia forsythiae GN2-R2T	MT012223	94.55	95.37	96.07	96.27	96.06	95.46	95.87	96.1	94.85	94.99	94.19	94.88	95.54	95.26	94.97	95.33	95.49	95.82	95.28	95.54	95.47	95.52	95.33	95.25	95.52	95.8	96.45	96.45	96.59	95.64	95.97	96.12	95.54	95.73	95.82	96.02	95.37	95.41	95.51	95.82	95.68	95.05	95.88	95.75	96.68	95.98	96.33
77	Massilia horti ONC3T	MT378212	95.88	95.89	96.27	96.05	96.28	95.87	96.41	96.96	96.33	96.23	95.96	96.38	96.38	96.52	96.2	96.09	96.18	96.59	96.26	96.3	96.24	96.24	96.23	96.3	96.65	96.95	97.1	96.96	97.17	95.98	96.32	96.46	96.17	96.45	96.45	96.66	95.95	95.96	96.13	96.45	96.32	95.87	97.17	96.45	96.76	96.48	96.39
78	Duganella radicis Sac-41T	EU672807	95.42	96.25	95.49	95.85	95.65	95.2	95.79	97.43	96.85	97.07	97.78	97.46	97.21	97.22	97.47	97.5	96.71	96.64	96.15	96.28	96.42	96.49	96.42	96.57	96.64	96.78	97	96.85	97.21	96.35	96.85	96.89	96.49	96.64	97.14	97.2	96.62	96.35	96.78	97.14	97.28	96.71	96.71	96.42	96.57	96.14	96
79	Duganella danionis E3/2T	KX427103	95.21	95.87	95.55	95.84	95.64	95.37	95.71	97.09	96.65	96.82	97.29	96.5	97.15	97.1	97.25	97.02	97.07	96.67	96.23	96.46	96.5	96.49	96.53	96.67	96.6	96.74	97.29	97.36	97.64	96.53	97.13	96.97	96.85	96.95	96.88	96.94	97.27	97.27	97.57	98.13	97.9	96.95	96.74	96.88	97.48	96.02	96.01
80	Duganella qianjiadongensis CY13WT	MN865821	95.23	95.88	95.69	96.26	95.43	95.44	95.86	97.12	96.66	96.79	97.16	96.68	97.11	96.92	96.86	97.25	97.32	97.03	96.44	96.78	96.89	96.85	96.64	96.84	97.06	97.11	97.72	97.45	97.58	96.83	97.38	96.92	96.82	96.91	96.91	97.24	96.91	96.9	97.6	98.39	98.14	97.18	96.77	97.37	97.81	95.88	96.34
81	Duganella fentianensis FT93WT	MN865822	95.37	95.95	95.49	96.12	95.36	95.3	95.72	97.18	96.73	96.99	97.23	96.75	97.38	97.19	96.93	97.18	97.25	96.96	96.59	96.98	96.96	96.85	96.98	97.04	97.2	97.18	97.79	97.79	97.65	96.76	97.31	97.06	96.82	97.05	96.91	97.44	97.05	97.11	97.46	98.32	98.07	97.11	96.57	97.17	97.53	95.81	96.48
82	Duganella rivi FT55WT	MN865823	95.57	95.88	95.55	95.78	95.21	95.23	95.57	97.18	96.45	97.93	97.37	97.04	97.18	97.99	97.23	97.32	96.97	96.15	95.7	96.17	96.27	96.21	96.31	96.24	96.04	96.38	96.85	96.98	97.32	96.28	97.03	96.57	96.34	96.58	96.44	96.64	96.54	96.69	96.98	97.52	97.1	97.05	96.64	96.49	96.78	95.53	96.07
83	Duganella aquatilis FT26WT	MK968135	95.3	95.29	95.55	95.78	95.07	95.3	95.64	96.72	95.91	96.45	96.87	96.46	96.85	97.19	97.08	97.45	97.32	96.63	96.22	96.51	96.68	96.64	96.78	96.71	96.99	96.85	96.91	96.91	97.45	96.56	97.24	96.78	96.62	96.78	96.91	96.77	96.32	96.42	97.39	97.58	97.38	97.32	96.37	96.56	96.84	96.01	96.48
84	Duganella alba FT9WT	MK968133	95.3	95.58	95.28	95.65	95.21	95.58	95.72	96.85	96.04	96.66	97.16	96.82	97.18	97.53	97.23	97.52	97.39	96.83	96.74	96.85	96.82	96.78	97.38	97.18	97.47	97.05	97.25	97.18	97.38	96.49	97.38	96.99	96.82	97.05	97.18	97.31	96.54	96.42	96.91	97.11	97.1	96.78	96.03	96.49	96.3	95.95	97.17
85	Pseudoduganella dura DSM 17513T	MT758057	95.03	95.7	95.18	95.4	95.1	94.88	95.55	96.67	95.93	95.86	96.97	96.58	96.66	96.3	96.64	96.74	96.44	96.14	95.69	95.85	95.92	95.92	96.22	96.36	96.51	96.07	96.29	96.36	96.59	95.77	96.44	96.06	95.77	95.92	96.14	96.21	95.77	95.55	95.99	96.22	96.51	96.07	95.77	96.36	96.59	96.22	96.07
86	Pseudoduganella lutea DSM 17373T	AY966001	95.47	95.81	95.7	95.75	95.36	95.31	95.65	96.97	96.31	95.74	96.3	96.29	96.63	96.02	96.11	96.63	95.96	96	95.42	95.73	95.95	95.85	95.87	95.93	95.99	95.88	96.49	96.63	96.9	95.77	96.44	96.24	95.81	95.88	96.21	96.34	95.88	95.61	96.47	96.63	96.72	96.56	96.34	96.49	97.14	96.24	95.67
87	Pseudoduganella albidiflava DSM 17472T	MT758058	95.47	96	95.62	95.92	95.77	95.32	95.77	97.18	96.81	95.71	96.6	97.18	96.96	96.15	96.24	96.74	96.07	95.85	95.37	95.7	95.92	95.92	95.7	95.85	95.69	95.77	96.74	96.96	97.03	96.37	96.88	96.59	96.07	96.22	96.29	96.43	96.07	96	96.74	97.11	97.11	96.96	96.96	96.74	97.11	96.44	95.93
88	Pseudoduganella umbonata DSM 26121T	HM053474	96.08	96.39	95.96	96.36	95.88	95.57	95.93	97.33	96.73	96.22	96.83	97.11	97.4	96.5	96.57	97.19	96.44	96.13	95.54	96.13	96.22	96.14	96.06	96.13	96.12	96.15	96.98	97.12	97.4	96.54	97.22	96.99	96.29	96.5	96.7	96.83	96.38	96.51	96.39	96.56	96.57	96.77	96.2	96.41	96.79	96.01	96.43
89	Duganella violaceinigra YIM 31327T	AY376163	94.98	95.21	95.8	95.88	95.35	95.2	95.49	97	96.14	96.03	96.3	96.03	96.86	96.17	96	96.37	96.35	95.88	95.22	95.53	95.63	95.61	95.6	95.74	95.81	96.09	97.07	96.93	97.42	96.37	96.97	96.69	96.48	96.65	96.58	96.57	96.54	96.48	97.13	97.42	97.18	96.58	96.51	96.93	97.32	95.99	95.99
90	Pseudoduganella guangdongensis DS3T	MK968434	95.1	95.36	95.49	95.85	94.99	95.02	95.42	96.98	96.25	95.98	95.95	96.17	96.85	96.79	96.03	96.38	96.29	95.41	94.81	95.44	95.44	95.35	95.7	95.77	95.56	95.64	96.24	96.38	96.71	96.01	96.55	96.15	95.93	96.11	96.38	96.43	95.73	95.93	96.57	97.05	96.96	96.51	96.7	96.7	96.84	95.53	95.86
91	Massilia eburnea JCM 31587T	KU321297	95.21	95.51	95.69	96.04	95.14	95.41	95.57	97.23	96.81	96.12	96.37	96.32	96.81	96.19	95.99	96.25	96.39	95.76	95.23	95.56	95.69	95.63	95.76	95.9	95.69	95.97	96.88	97.01	97.36	96.36	96.67	96.44	96.32	96.46	96.39	96.45	96.54	96.32	96.94	97.36	97.08	96.25	96.67	96.94	97.5	96.25	95.91
92	Pseudoduganella flava DSM 26639T	HM777013	95	96.1	96	96.86	96.23	95.79	95.94	96.65	96.29	95.02	95.3	96.11	96.43	95.37	95.24	95.65	95.07	95.43	94.86	95.36	95.36	95.4	94.93	95.07	95.43	95.5	96.57	96.43	96.93	95.43	96.15	95.82	95.43	95.57	95.79	95.85	95.14	95.29	96.15	96.43	96.36	96.15	97.07	96.43	97	96.36	95.79
93	Massilia endophytica DM-R-R2A-13T	OL314544	95.15	96.03	96.51	96.78	96.15	95.92	96.16	96.52	95.95	94.96	94.95	95.54	95.77	95.44	94.82	95.36	95.8	95.83	95.26	95.63	95.85	95.78	95.63	95.77	95.68	96.04	96.65	96.65	97.06	95.76	96.2	95.85	95.58	95.77	95.56	95.48	95.43	95.38	95.95	96.31	96.13	95.36	97.06	96.17	97.18	95.46	95.66
94	Pseudoduganella armeniaca ZMN-3T	KY432691	95.15	95.81	95.65	96.07	95.5	95.07	95.79	96.51	95.65	95.59	95.58	95.67	95.72	96.09	95.85	95.93	96.15	96.29	95.76	95.93	96.07	96.12	95.79	95.93	96	96.5	97.07	96.93	97.36	95.86	96.5	96.11	96	96.15	95.93	95.85	95.58	95.57	96.57	97	96.79	95.79	96.79	96.57	97.36	96.07	95.58
95	Pseudoduganella violacea CECT 8897T	KT003718	94.2	95.81	94.34	95.26	95.94	93.91	95.64	95.9	95.34	95.35	96.78	95.28	95.82	95.2	95.38	95.47	95.4	95.26	94.71	95.19	95.05	95.71	94.69	94.83	94.97	95.33	95.82	95.75	96.04	95.19	96.04	96.45	95.33	95.47	95.4	95.39	96.1	95.61	95.47	95.54	95.47	94.98	94.55	94.83	95.4	94.62	95.12
96	Pseudoduganella plicata KCTC 12344T	MT758059	95.1	95.04	95.33	95.62	95.7	95.32	95.7	96.3	95.78	96.01	96.23	96.5	96.14	96.67	96.71	96.88	97.03	96.51	96.07	96.44	96.36	96.44	96.44	96.44	96.36	96.59	96.51	96.59	96.74	96.37	96.74	96.07	96.14	96.29	96.51	96.51	96	96.44	96.74	97.03	97.03	96.96	97.11	96.88	96.59	97.77	97.04
97	Pseudoduganella buxea CGMCC 1.15931T	KX944690	95.37	95.44	95.65	95.58	95.43	95.3	96.16	96.41	95.72	96.35	96.44	96.04	95.79	96.56	96.61	96.82	96.96	96.75	96.22	96.41	96.54	96.49	96.48	96.48	96.68	96.82	96.89	96.75	97.03	96.23	96.62	96.31	96.34	96.48	96.41	96.47	96.47	96.48	96.81	97.1	96.96	96.48	96.96	97.17	97.38	96.27	95.79
98	Pseudoduganella lurida CGMCC 1.10822T	HQ839786	95.14	95.73	95.75	95.68	95.36	95.72	96.01	96.13	95.32	96.68	96.3	95.75	95.37	96.47	96.23	96.19	96.76	95.98	95.47	95.71	95.92	95.85	96.19	96.12	96.04	96.15	96.19	96.19	96.33	95.68	95.72	95.62	95.51	95.75	95.92	96.18	95.66	95.52	95.33	95.71	95.79	95.24	96.59	95.92	95.86	95.32	95.93
99	Massilia timonae UR/MT95T	U54470	95.3	96.69	96.44	96.39	95.57	96.27	96.23	95.71	94.75	95.11	94.81	94.73	94.96	95.52	94.84	95.16	95.25	95.14	94.59	95.03	95.09	94.99	95.3	95.36	95.28	95.5	95.97	96.04	96.44	94.56	95.17	95.24	94.68	94.96	95.1	95.15	94.77	94.83	95.47	95.84	95.51	95.03	96.64	96.22	96.91	95.53	95.66
100	Massilia puerhi SJY3T	MN014073	94.76	95.88	95.69	96.26	95.95	96	95.5	95.37	94.68	95.04	94.59	94.73	95.1	95.11	94.61	95.03	95.74	95.61	95.04	95.57	95.51	95.42	95.63	95.7	95.83	95.64	96.04	96.17	96.24	94.84	95.31	94.96	94.69	94.9	95.1	95.35	94.33	94.7	95.54	95.84	96.2	95.23	96.37	96.43	96.64	96.57	96.69
101	Massilia arenae GEM 5T	KT369857	94.92	95.96	95.56	96.22	95.8	95.86	95.42	95.31	94.89	95.52	95.09	95.17	95.1	95.38	95.14	95.37	95.67	95.55	94.96	95.51	95.44	95.35	95.57	95.63	95.77	95.85	96.11	96.11	96.45	94.84	95.45	95.14	94.76	95.12	95.17	95.36	94.92	95.18	95.47	95.77	96	95.24	96.64	96.36	96.44	96.36	96.69
102	Massilia aurea CCM 7363T	MT760134	94.79	96.55	96.25	96.18	96.49	96.56	96.08	95.41	94.96	95.19	95.42	94.77	95.34	95.11	95.03	95.34	96.25	96.48	96.08	96.18	96.25	96.25	96.56	96.71	96.79	96.18	96.64	96.71	96.56	95.65	95.57	95.71	95.18	95.34	95.57	95.94	95.47	95.18	95.87	96.33	96.71	95.34	96.87	97.55	97.71	97.63	97.25
103	Massilia oculi CCM 7900T	MT760187	95.55	96.96	97.11	96.36	97.04	97.04	97.18	95.26	94.22	95.19	95.41	95.13	94.88	95.19	94.99	95.1	95.7	95.85	95.53	95.55	95.62	95.69	96.07	96.22	96.66	96.22	96.36	96.07	96.07	95.03	95.1	94.88	94.96	95.1	95.33	95.54	95.03	94.81	95.18	95.77	95.77	94.88	96.29	96.88	96.66	96.66	96.15
Values were calculated using PHYDIT Similarity Analysis. The matrix is symmetric; only the lower triangular portion is shown.
[truncated: 56 more columns]

## Sheet: Table S3
Table S3 Genome features of strains R1T, R57T, R64T, HSC-15S17T, and FT81WT
Strains	Accession number	Genome size bp	Number of contigs	G + C content %*	Number of CDSs with protein	Number of tRNAs	Completeness %*	Contamination %*
Duganella sp. R1T	BPWI00000000	7379680	75	64.2	6445	78	99.59	1.13
Duganella sp. R64T	BPWK00000000	7286907	101	64.3	6351	81	99.92	1.01
Duganella violaceipulchra HSC-15S17T	JAHTGR000000000	7528709	278	64.1	6611	80	99.53	0.75
Duganella sp. R57T	BPWJ00000000	7054976	45	64.7	6179	84	99.97	0.75
Duganella vulcania FT81WT	WWCX00000000	7675978	342	64.2	7056	74	100	1.41
*Calculated based on the genome sequences

## Sheet: Table S4
Table S4 Genomaple-based prediction of functional modules in strains R1T, R57T, R64T, HSC-15S17T, and FT81WT
		Module completion ratio %
Module ID	Pathway	R1T	R64T	HSC-15S17T	R57T	FT81WT
M00001	Glycolysis Embden-Meyerhof pathway, glucose => pyruvate	90	90	90	90	70
M00002	Glycolysis, core module involving three-carbon compounds	100	100	100	100	83.3
M00003	Gluconeogenesis, oxaloacetate => fructose-6P	100	100	100	100	75
M00307	Pyruvate oxidation, pyruvate => acetyl-CoA	100	100	100	100	100
M00009	Citrate cycle TCA cycle, Krebs cycle	100	100	100	100	75
M00010	Citrate cycle, first carbon oxidation, oxaloacetate => 2-oxoglutarate	100	100	100	100	100
M00011	Citrate cycle, second carbon oxidation, 2-oxoglutarate => oxaloacetate	100	100	100	100	60
M00004	Pentose phosphate pathway Pentose phosphate cycle	75	75	75	75	62.5
M00006	Pentose phosphate pathway, oxidative phase, glucose 6P => ribulose 5P	33.3	33.3	33.3	33.3	33.3
M00007	Pentose phosphate pathway, non-oxidative phase, fructose 6P => ribose 5P	100	100	100	100	75
M00580	Pentose phosphate pathway, archaea, fructose 6P => ribose 5P	50	50	50	50	50
M00005	PRPP biosynthesis, ribose 5P => PRPP	100	100	100	100	100
M00008	Entner-Doudoroff pathway, glucose-6P => glyceraldehyde-3P + pyruvate	75	75	75	75	50
M00308	Semi-phosphorylative Entner-Doudoroff pathway, gluconate => glycerate-3P	80	60	60	60	25
M00633	Semi-phosphorylative Entner-Doudoroff pathway, gluconate/galactonate => glycerate-3P	0	0	0	0	0
M00309	Non-phosphorylative Entner-Doudoroff pathway, gluconate/galactonate => glycerate	0	0	0	0	0
M00014	Glucuronate pathway uronate pathway	25	25	25	12.5	12.5
M00630	D-Galacturonate degradation fungi, D-galacturonate => glycerol	0	0	0	0	0
M00631	D-Galacturonate degradation bacteria, D-galacturonate => pyruvate + D-glyceraldehyde 3P	80	60	20	60	40
M00061	D-Glucuronate degradation, D-glucuronate => pyruvate + D-glyceraldehyde 3P	40	20	20	20	20
M00081	Pectin degradation	33.3	33.3	33.3	33.3	33.3
M00632	Galactose degradation, Leloir pathway, galactose => alpha-D-glucose-1P	25	50	50	50	50
M00552	D-galactonate degradation, De Ley-Doudoroff pathway, D-galactonate => glycerate-3P	100	100	100	100	80
M00129	Ascorbate biosynthesis, animals, glucose-1P => ascorbate	42.9	42.9	42.9	28.6	28.6
M00114	Ascorbate biosynthesis, plants, glucose-6P => ascorbate	55.6	55.6	44.4	55.6	55.6
M00550	Ascorbate degradation, ascorbate => D-xylulose-5P	0	0	0	0	0
M00854	Glycogen biosynthesis, glucose-1P => glycogen/starch	50	50	50	50	50
M00855	Glycogen degradation, glycogen => glucose-6P	33.3	33.3	33.3	33.3	33.3
M00565	Trehalose biosynthesis, D-glucose 1P => trehalose	0	0	0	0	0
M00549	Nucleotide sugar biosynthesis, glucose => UDP-glucose	100	100	100	100	100
M00554	Nucleotide sugar biosynthesis, galactose => UDP-galactose	0	0	0	0	0
M00761	Undecaprenylphosphate alpha-L-Ara4N biosynthesis, UDP-GlcA => undecaprenyl phosphate alpha-L-Ara4N	25	25	25	25	25
M00012	Glyoxylate cycle	100	100	100	100	80
M00373	Ethylmalonyl pathway	16.7	16.7	16.7	16.7	8.3
M00740	Methylaspartate cycle	45.5	45.5	45.5	45.5	36.4
M00532	Photorespiration	30	30	30	30	10
M00013	Malonate semialdehyde pathway, propanoyl-CoA => acetyl-CoA	40	40	40	40	40
M00741	Propanoyl-CoA metabolism, propanoyl-CoA => succinyl-CoA	0	33.3	33.3	0	0
M00130	Inositol phosphate metabolism, PI=> PIP2 => Ins1,4,5P3 => Ins1,3,4,5P4	0	0	0	0	0
M00131	Inositol phosphate metabolism, Ins1,3,4,5P4 => Ins1,3,4P3 => myo-inositol	25	25	25	25	25
M00132	Inositol phosphate metabolism, Ins1,3,4P3 => phytate	0	0	0	0	0
M00165	Reductive pentose phosphate cycle Calvin cycle	72.7	72.7	72.7	72.7	45.5
M00166	Reductive pentose phosphate cycle, ribulose-5P => glyceraldehyde-3P	50	50	50	50	25
M00167	Reductive pentose phosphate cycle, glyceraldehyde-3P => ribulose-5P	85.7	85.7	85.7	85.7	57.1
M00168	CAM Crassulacean acid metabolism, dark	100	100	100	100	50
M00169	CAM Crassulacean acid metabolism, light	50	50	50	50	50
M00172	C4-dicarboxylic acid cycle, NADP - malic enzyme type	50	50	50	50	50
M00171	C4-dicarboxylic acid cycle, NAD - malic enzyme type	14.3	14.3	14.3	14.3	14.3
M00170	C4-dicarboxylic acid cycle, phosphoenolpyruvate carboxykinase type	25	25	25	25	25
M00173	Reductive citrate cycle Arnon-Buchanan cycle	72.7	72.7	72.7	72.7	45.5
M00376	3-Hydroxypropionate bi-cycle	23.1	23.1	23.1	23.1	7.7
M00375	Hydroxypropionate-hydroxybutylate cycle	7.1	7.1	7.1	7.1	7.1
M00374	Dicarboxylate-hydroxybutyrate cycle	53.8	53.8	53.8	53.8	30.8
M00377	Reductive acetyl-CoA pathway Wood-Ljungdahl pathway	28.6	28.6	28.6	28.6	14.3
M00579	Phosphate acetyltransferase-acetate kinase pathway, acetyl-CoA => acetate	100	100	100	100	100
M00620	Incomplete reductive citrate cycle, acetyl-CoA => oxoglutarate	28.6	28.6	28.6	28.6	0
M00567	Methanogenesis, CO2 => methane	0	0	0	0	0
M00357	Methanogenesis, acetate => methane	33.3	33.3	33.3	33.3	33.3
M00356	Methanogenesis, methanol => methane	0	0	0	0	0
M00563	Methanogenesis, methylamine/dimethylamine/trimethylamine => methane	0	0	0	0	0
M00358	Coenzyme M biosynthesis	0	0	0	0	0
M00608	2-Oxocarboxylic acid chain extension, 2-oxoglutarate => 2-oxoadipate => 2-oxopimelate => 2-oxosuberate	0	0	0	0	0
M00174	Methane oxidation, methanotroph, methane => formaldehyde	0	0	0	0	0
M00346	Formaldehyde assimilation, serine pathway	66.7	66.7	66.7	66.7	44.4
M00345	Formaldehyde assimilation, ribulose monophosphate pathway	33.3	33.3	33.3	33.3	0
M00344	Formaldehyde assimilation, xylulose monophosphate pathway	50	50	50	50	25
M00378	F420 biosynthesis	0	0	0	0	0
M00422	Acetyl-CoA pathway, CO2 => acetyl-CoA	0	0	0	0	0
M00175	Nitrogen fixation, nitrogen => ammonia	0	0	0	0	0
M00531	Assimilatory nitrate reduction, nitrate => ammonia	50	50	50	50	50
M00530	Dissimilatory nitrate reduction, nitrate => ammonia	50	100	100	100	100
M00529	Denitrification, nitrate => nitrogen	0	50	75	75	100
M00528	Nitrification, ammonia => nitrite	0	0	0	0	0
M00804	Complete nitrification, comammox, ammonia => nitrite => nitrate	0	33.3	33.3	33.3	33.3
M00176	Assimilatory sulfate reduction, sulfate => H2S	100	100	100	100	33.3
M00596	Dissimilatory sulfate reduction, sulfate => H2S	33.3	33.3	33.3	33.3	0
M00595	Thiosulfate oxidation by SOX complex, thiosulfate => sulfate	0	100	100	0	0
M00082	Fatty acid biosynthesis, initiation	100	100	100	100	66.7
M00083	Fatty acid biosynthesis, elongation	100	100	100	100	100
M00085	Fatty acid biosynthesis, elongation, mitochondria	0	0	0	0	0
M00415	Fatty acid biosynthesis, elongation, endoplasmic reticulum	0	0	0	0	0
M00086	beta-Oxidation, acyl-CoA synthesis	100	100	100	100	100
M00087	beta-Oxidation	100	100	100	100	100
M00861	beta-Oxidation, peroxisome, VLCFA	0	0	0	0	0
M00101	Cholesterol biosynthesis, squalene 2,3-epoxide => cholesterol	0	0	0	0	0
M00102	Ergocalciferol biosynthesis	0	0	0	0	0
M00103	Cholecalciferol biosynthesis	0	0	0	0	0
M00104	Bile acid biosynthesis, cholesterol => cholate/chenodeoxycholate	8.3	8.3	8.3	8.3	8.3
M00106	Conjugated bile acid biosynthesis, cholate => taurocholate/glycocholate	0	0	0	0	0
M00862	beta-Oxidation, peroxisome, tri/dihydroxycholestanoyl-CoA => choloyl/chenodeoxycholoyl-CoA	0	0	0	0	0
M00107	Steroid hormone biosynthesis, cholesterol => prognenolone => progesterone	50	0	0	0	0
M00108	C21-Steroid hormone biosynthesis, progesterone => corticosterone/aldosterone	0	0	0	0	0
M00109	C21-Steroid hormone biosynthesis, progesterone => cortisol/cortisone	0	0	0	0	0
M00110	C19/C18-Steroid hormone biosynthesis, pregnenolone => androstenedione => estrone	33.3	0	0	0	0
M00088	Ketone body biosynthesis, acetyl-CoA => acetoacetate/3-hydroxybutyrate/acetone	60	60	60	60	60
M00089	Triacylglycerol biosynthesis	60	60	60	60	40
M00098	Acylglycerol degradation	50	50	50	50	50
M00090	Phosphatidylcholine PC biosynthesis, choline => PC	0	0	0	0	0
M00091	Phosphatidylcholine PC biosynthesis, PE => PC	0	0	0	0	0
M00092	Phosphatidylethanolamine PE biosynthesis, ethanolamine => PE	0	0	0	0	0
M00093	Phosphatidylethanolamine PE biosynthesis, PA => PS => PE	100	100	100	100	100
M00094	Ceramide biosynthesis	0	0	0	0	0
M00066	Lactosylceramide biosynthesis	0	0	0	0	0
M00067	Sulfoglycolipids biosynthesis, ceramide/1-alkyl-2-acylglycerol => sulfatide/seminolipid	0	0	0	0	0
M00099	Sphingosine biosynthesis	0	0	0	0	0
M00100	Sphingosine degradation	0	0	0	0	0
M00113	Jasmonic acid biosynthesis	12.5	12.5	12.5	12.5	12.5
M00048	Inosine monophosphate biosynthesis, PRPP + glutamine => IMP	100	100	100	100	87.5
M00049	Adenine ribonucleotide biosynthesis, IMP => ADP,ATP	100	100	100	100	50
M00050	Guanine ribonucleotide biosynthesis IMP => GDP,GTP	100	100	100	100	25
M00546	Purine degradation, xanthine => urea	33.3	33.3	33.3	33.3	33.3
M00051	Uridine monophosphate biosynthesis, glutamine + PRPP => UMP	83.3	83.3	83.3	83.3	60
M00052	Pyrimidine ribonucleotide biosynthesis, UMP => UDP/UTP,CDP/CTP	100	100	100	100	66.7
M00053	Pyrimidine deoxyribonuleotide biosynthesis, CDP/CTP => dCDP/dCTP,dTDP/dTTP	87.5	100	100	100	62.5
M00046	Pyrimidine degradation, uracil => beta-alanine, thymine => 3-aminoisobutanoate	100	100	100	100	100
M00020	Serine biosynthesis, glycerate-3P => serine	100	100	100	100	66.7
M00018	Threonine biosynthesis, aspartate => homoserine => threonine	100	100	100	100	80
M00555	Betaine biosynthesis, choline => betaine	100	50	100	50	50
M00033	Ectoine biosynthesis, aspartate => ectoine	40	40	40	40	20
M00021	Cysteine biosynthesis, serine => cysteine	100	100	100	100	100
M00338	Cysteine biosynthesis, homocysteine + serine => cysteine	100	100	100	100	100
M00609	Cysteine biosynthesis, methionine => cysteine	33.3	33.3	33.3	33.3	16.7
M00017	Methionine biosynthesis, apartate => homoserine => methionine	71.4	71.4	71.4	71.4	57.1
M00034	Methionine salvage pathway	55.6	55.6	55.6	55.6	44.4
M00035	Methionine degradation	75	100	100	100	75
M00368	Ethylene biosynthesis, methionine => ethylene	33.3	33.3	33.3	33.3	0
M00019	Valine/isoleucine biosynthesis, pyruvate => valine / 2-oxobutanoate => isoleucine	100	100	100	100	50
M00535	Isoleucine biosynthesis, pyruvate => 2-oxobutanoate	66.7	66.7	66.7	66.7	33.3
M00570	Isoleucine biosynthesis, threonine => 2-oxobutanoate => isoleucine	100	100	100	100	60
M00432	Leucine biosynthesis, 2-oxoisovalerate => 2-oxoisocaproate	100	100	100	100	66.7
M00036	Leucine degradation, leucine => acetoacetate + acetyl-CoA	83.3	83.3	83.3	83.3	83.3
M00016	Lysine biosynthesis, succinyl-DAP pathway, aspartate => lysine	100	100	100	100	55.6
M00525	Lysine biosynthesis, acetyl-DAP pathway, aspartate => lysine	66.7	66.7	66.7	66.7	55.6
M00526	Lysine biosynthesis, DAP dehydrogenase pathway, aspartate => lysine	83.3	83.3	83.3	83.3	66.7
M00527	Lysine biosynthesis, DAP aminotransferase pathway, aspartate => lysine	85.7	85.7	85.7	85.7	71.4
M00030	Lysine biosynthesis, AAA pathway, 2-oxoglutarate => 2-aminoadipate => lysine	0	0	0	0	0
M00433	Lysine biosynthesis, 2-oxoglutarate => 2-oxoadipate	0	0	0	0	0
M00031	Lysine biosynthesis, mediated by LysW, 2-aminoadipate => lysine	0	0	0	0	0
M00032	Lysine degradation, lysine => saccharopine => acetoacetyl-CoA	28.6	28.6	28.6	28.6	16.7
M00028	Ornithine biosynthesis, glutamate => ornithine	100	80	80	80	50
M00763	Ornithine biosynthesis, mediated by LysW, glutamate => ornithine	0	0	0	0	0
M00844	Arginine biosynthesis, ornithine => arginine	100	100	100	100	66.7
M00845	Arginine biosynthesis, glutamate => acetylcitrulline => arginine	57.1	42.9	42.9	42.9	14.3
M00029	Urea cycle	80	80	80	80	60
M00015	Proline biosynthesis, glutamate => proline	100	100	100	100	100
M00047	Creatine pathway	0	0	0	0	0
M00133	Polyamine biosynthesis, arginine => agmatine => putrescine => spermidine	75	75	75	75	75
M00134	Polyamine biosynthesis, arginine => ornithine => putrescine	50	50	50	50	50
M00135	GABA biosynthesis, eukaryotes, putrescine => GABA	66.7	100	100	100	100
M00136	GABA biosynthesis, prokaryotes, putrescine => GABA	25	0	25	25	25
M00026	Histidine biosynthesis, PRPP => histidine	88.9	88.9	88.9	88.9	62.5
M00045	Histidine degradation, histidine => N-formiminoglutamate => glutamate	100	100	100	100	100
M00022	Shikimate pathway, phosphoenolpyruvate + erythrose-4P => chorismate	100	100	100	100	100
M00023	Tryptophan biosynthesis, chorismate => tryptophan	100	100	100	100	80
M00024	Phenylalanine biosynthesis, chorismate => phenylalanine	100	100	100	100	100
M00025	Tyrosine biosynthesis, chorismate => tyrosine	100	100	100	100	100
M00040	Tyrosine biosynthesis, prephanate => pretyrosine => tyrosine	50	50	50	50	50
M00042	Catecholamine biosynthesis, tyrosine => dopamine => noradrenaline => adrenaline	0	0	25	0	0
M00043	Thyroid hormone biosynthesis, tyrosine => triiodothyronine/thyroxine	0	0	0	0	0
M00044	Tyrosine degradation, tyrosine => homogentisate	60	40	40	40	40
M00533	Homoprotocatechuate degradation, homoprotocatechuate => 2-oxohept-3-enedioate	25	25	0	25	0
M00545	Trans-cinnamate degradation, trans-cinnamate => acetyl-CoA	33.3	33.3	33.3	0	16.7
M00037	Melatonin biosynthesis, tryptophan => serotonin => melatonin	0	0	0	0	0
M00038	Tryptophan metabolism, tryptophan => kynurenine => 2-aminomuconate	28.6	28.6	28.6	28.6	28.6
M00027	GABA gamma-Aminobutyrate shunt	66.7	66.7	100	33.3	33.3
M00369	Cyanogenic glycoside biosynthesis, tyrosine => dhurrin	0	0	0	0	0
M00118	Glutathione biosynthesis, glutamate => glutathione	100	100	100	100	100
M00055	N-glycan precursor biosynthesis	0	0	0	0	0
M00072	N-glycosylation by oligosaccharyltransferase	0	0	0	0	0
M00073	N-glycan precursor trimming	0	0	0	0	0
M00074	N-glycan biosynthesis, high-mannose type	0	0	0	0	0
M00075	N-glycan biosynthesis, complex type	0	0	0	0	0
M00056	O-glycan biosynthesis, mucin type core	0	0	0	0	0
M00065	GPI-anchor biosynthesis, core oligosaccharide	0	0	0	0	0
M00070	Glycosphingolipid biosynthesis, lacto-series, LacCer => Lc4Cer	0	0	0	0	0
M00071	Glycosphingolipid biosynthesis, neolacto-series, LacCer => nLc4Cer	0	0	0	0	0
M00068	Glycosphingolipid biosynthesis, globo-series, LacCer => Gb4Cer	0	0	0	0	0
M00069	Glycosphingolipid biosynthesis, ganglio series, LacCer => GT3	0	0	0	0	0
M00057	Glycosaminoglycan biosynthesis, linkage tetrasaccharide	0	0	0	0	0
M00058	Glycosaminoglycan biosynthesis, chondroitin sulfate backbone	0	0	0	0	0
M00059	Glycosaminoglycan biosynthesis, heparan sulfate backbone	0	0	0	0	0
M00076	Dermatan sulfate degradation	20	20	20	0	0
M00077	Chondroitin sulfate degradation	25	25	25	0	0
M00078	Heparan sulfate degradation	12.5	12.5	12.5	0	0
M00079	Keratan sulfate degradation	25	25	25	25	25
M00060	KDO2-lipid A biosynthesis, Raetz pathway, LpxL-LpxM type	88.9	88.9	88.9	88.9	77.8
M00866	KDO2-lipid A biosynthesis, Raetz pathway, non-LpxL-LpxM type	88.9	88.9	88.9	88.9	77.8
M00867	KDO2-lipid A modification pathway	0	0	0	0	0
M00063	CMP-KDO biosynthesis	100	100	100	100	50
M00064	ADP-L-glycero-D-manno-heptose biosynthesis	80	80	80	80	60
M00127	Thiamine biosynthesis, AIR => thiamine-P/thiamine-2P	80	80	80	80	80
M00125	Riboflavin biosynthesis, GTP => riboflavin/FMN/FAD	100	100	100	100	100
M00124	Pyridoxal biosynthesis, erythrose-4P => pyridoxal-5P	66.7	66.7	66.7	66.7	50
M00115	NAD biosynthesis, aspartate => NAD	100	100	100	100	100
M00810	Nicotine degradation, pyridine pathway, nicotine => 2,6-dihydroxypyridine/succinate semialdehyde	0	0	0	0	0
M00811	Nicotine degradation, pyrrolidine pathway, nicotine => succinate semialdehyde	0	0	0	0	0
M00622	Nicotinate degradation, nicotinate => fumarate	16.7	0	0	0	0
M00119	Pantothenate biosynthesis, valine/L-aspartate => pantothenate	100	100	100	100	60
M00120	Coenzyme A biosynthesis, pantothenate => CoA	100	100	100	100	100
M00572	Pimeloyl-ACP biosynthesis, BioC-BioH pathway, malonyl-ACP => pimeloyl-ACP	83.3	83.3	83.3	83.3	83.3
M00123	Biotin biosynthesis, pimeloyl-ACP/CoA => biotin	100	100	100	100	100
M00573	Biotin biosynthesis, BioI pathway, long-chain-acyl-ACP => pimeloyl-ACP => biotin	80	80	80	80	80
M00577	Biotin biosynthesis, BioW pathway, pimelate => pimeloyl-CoA => biotin	80	80	80	80	80
M00126	Tetrahydrofolate biosynthesis, GTP => THF	100	100	100	100	71.4
M00840	Tetrahydrofolate biosynthesis, mediated by ribA and trpF, GTP => THF	50	50	50	50	50
M00841	Tetrahydrofolate biosynthesis, mediated by PTPS, GTP => THF	66.7	66.7	66.7	66.7	33.3
M00842	Tetrahydrobiopterin biosynthesis, GTP => BH4	66.7	66.7	66.7	66.7	0
M00843	L-threo-Tetrahydrobiopterin biosynthesis, GTP => L-threo-BH4	66.7	66.7	66.7	66.7	0
M00140	C1-unit interconversion, prokaryotes	66.7	66.7	66.7	66.7	0
M00141	C1-unit interconversion, eukaryotes	50	50	50	50	0
M00868	Heme biosynthesis, animals and fungi, glycine => heme	75	75	75	75	62.5
M00121	Heme biosynthesis, plants and bacteria, glutamate => heme	90	90	90	90	80
M00846	Siroheme biosynthesis, glutamate => siroheme	85.7	85.7	85.7	85.7	85.7
M00847	Heme biosynthesis, archaea, siroheme => heme	0	0	0	0	0
M00122	Cobalamin biosynthesis, cobinamide => cobalamin	100	100	100	100	100
M00836	Coenzyme F430 biosynthesis, sirohydrochlorin => coenzyme F430	0	0	0	0	0
M00117	Ubiquinone biosynthesis, prokaryotes, chorismate => ubiquinone	77.8	77.8	77.8	77.8	66.7
M00128	Ubiquinone biosynthesis, eukaryotes, 4-hydroxybenzoate => ubiquinone	16.7	16.7	16.7	16.7	16.7
M00116	Menaquinone biosynthesis, chorismate => menaquinol	33.3	33.3	33.3	33.3	0
M00112	Tocopherol/tocotorienol biosynthesis	0	0	0	0	0
M00095	C5 isoprenoid biosynthesis, mevalonate pathway	14.3	14.3	14.3	14.3	14.3
M00849	C5 isoprenoid biosynthesis, mevalonate pathway, archaea	14.3	14.3	14.3	14.3	14.3
M00096	C5 isoprenoid biosynthesis, non-mevalonate pathway	87.5	87.5	87.5	87.5	75
M00364	C10-C20 isoprenoid biosynthesis, bacteria	50	50	50	50	50
M00365	C10-C20 isoprenoid biosynthesis, archaea	0	0	0	0	0
M00366	C10-C20 isoprenoid biosynthesis, plants	0	0	0	0	0
M00367	C10-C20 isoprenoid biosynthesis, non-plant eukaryotes	0	0	0	0	0
M00097	beta-Carotene biosynthesis, GGAP => beta-carotene	16.7	16.7	16.7	16.7	16.7
M00372	Abscisic acid biosynthesis, beta-carotene => abscisic acid	0	0	0	0	0
M00371	Castasterone biosynthesis, campesterol => castasterone	0	0	0	0	0
M00773	Tylosin biosynthesis, methylmalonyl-CoA + malonyl-CoA => tylactone => tylosin	0	0	0	0	0
M00774	Erythromycin biosynthesis, propanoyl-CoA + methylmalonyl-CoA => deoxyerythronolide B => erythromycin A/B	0	0	0	0	0
M00775	Oleandomycin biosynthesis, malonyl-CoA + methylmalonyl-CoA => 8,8a-deoxyoleandolide => oleandomycin	0	0	0	0	0
M00776	Pikromycin/methymycin biosynthesis, methylmalonyl-CoA + malonyl-CoA => narbonolide/10-deoxymethynolide => pikromycin/methymycin	0	0	0	0	0
M00777	Avermectin biosynthesis, 2-methylbutanoyl-CoA/isobutyryl-CoA => 6,8a-Seco-6,8a-deoxy-5-oxoavermectin 1a/1b aglycone => avermectin A1a/B1a/A1b/B1b	0	0	0	0	0
M00824	9-membered enediyne core biosynthesis, malonyl-CoA => 3-hydroxyhexadeca-4,6,8,10,12,14-hexaenoyl-ACP => 9-membered enediyne core	0	0	0	0	0
M00825	10-membered enediyne core biosynthesis, malonyl-CoA => 3-hydroxyhexadeca-4,6,8,10,12,14-hexaenoyl-ACP => 10-membered enediyne core	0	0	0	0	0
M00826	C-1027 benzoxazolinate moiety biosynthesis, chorismate => benzoxazolinyl-CoA	0	0	0	0	0
M00827	C-1027 beta-amino acid moiety biosynthesis, tyrosine => 3-chloro-4,5-dihydroxy-beta-phenylalanyl-PCP	0	0	0	0	0
M00828	Maduropeptin beta-hydroxy acid moiety biosynthesis, tyrosine => 3-4-hydroxyphenyl-3-oxopropanoyl-PCP	0	0	0	0	0
M00829	3,6-Dimethylsalicylyl-CoA biosynthesis, malonyl-CoA => 6-methylsalicylate => 3,6-dimethylsalicylyl-CoA	0	0	0	0	0
M00830	Neocarzinostatin naphthoate moiety biosynthesis, malonyl-CoA => 2-hydroxy-5-methyl-1-naphthoate => 2-hydroxy-7-methoxy-5-methyl-1-naphthoyl-CoA	0	0	0	0	0
M00831	Kedarcidin 2-hydroxynaphthoate moiety biosynthesis, malonyl-CoA => 3,6,8-trihydroxy-2-naphthoate => 3-hydroxy-7,8-dimethoxy-6-isopropoxy-2-naphthoyl-CoA	0	0	0	0	0
M00832	Kedarcidin 2-aza-3-chloro-beta-tyrosine moiety biosynthesis, azatyrosine => 2-aza-3-chloro-beta-tyrosyl-PCP	0	0	0	0	0
M00834	Calicheamicin orsellinate moiety biosynthesis, malonyl-CoA => orsellinate-ACP => 5-iodo-2,3-dimethoxyorsellinate-ACP	0	0	0	0	0
M00833	Calicheamicin biosynthesis, calicheamicinone => calicheamicin	0	0	0	0	0
M00778	Type II polyketide backbone biosynthesis, acyl-CoA + malonyl-CoA => polyketide	0	0	0	0	0
M00779	Dihydrokalafungin biosynthesis, octaketide => dihydrokalafungin	0	0	0	0	0
M00780	Tetracycline/oxytetracycline biosynthesis, pretetramide => tetracycline/oxytetracycline	0	0	0	0	0
M00823	Chlortetracycline biosynthesis, pretetramide => chlortetracycline	0	0	0	0	0
M00781	Nogalavinone/aklavinone biosynthesis, deoxynogalonate/deoxyaklanonate => nogalavinone/aklavinone	0	0	0	0	0
M00782	Mithramycin biosynthesis, 4-demethylpremithramycinone => mithramycin	0	0	0	0	0
M00783	Tetracenomycin C/8-demethyltetracenomycin C biosynthesis, tetracenomycin F2 => tetracenomycin C/8-demethyltetracenomycin C	0	0	0	0	0
M00784	Elloramycin biosynthesis, 8-demethyltetracenomycin C => elloramycin A	0	0	0	0	0
M00793	dTDP-L-rhamnose biosynthesis	100	100	100	100	100
M00794	dTDP-6-deoxy-D-allose biosynthesis	0	0	0	0	0
M00795	dTDP-beta-L-noviose biosynthesis	0	0	0	0	0
M00796	dTDP-D-mycaminose biosynthesis	0	0	0	0	0
M00797	dTDP-D-desosamine biosynthesis	0	0	0	25	25
M00798	dTDP-L-mycarose biosynthesis	0	0	0	0	0
M00799	dTDP-L-oleandrose biosynthesis	0	0	0	0	0
M00800	dTDP-L-megosamine biosynthesis	0	0	0	20	20
M00801	dTDP-L-olivose biosynthesis	0	0	0	0	0
M00802	dTDP-D-forosamine biosynthesis	0	0	0	0	0
M00803	dTDP-D-angolosamine biosynthesis	0	0	0	25	25
M00672	Penicillin biosynthesis, aminoadipate + cycteine + valine => penicillin	0	0	0	0	0
M00673	Cephamycin C biosynthesis, aminoadipate + cycteine + valine => cephamycin C	0	0	0	0	0
M00675	Carbapenem-3-carboxylate biosynthesis, pyrroline-5-carboxylate + malonyl-CoA => carbapenem-3-carboxylate	0	0	0	0	0
M00736	Nocardicin A biosynthesis, L-pHPG + arginine + serine => nocardicin A	0	0	0	0	0
M00674	Clavaminate biosynthesis, arginine + glyceraldehyde-3P => clavaminate	0	0	0	0	0
M00039	Monolignol biosynthesis, phenylalanine/tyrosine => monolignol	0	10	10	10	10
M00137	Flavanone biosynthesis, phenylalanine => naringenin	0	0	0	0	0
M00138	Flavonoid biosynthesis, naringenin => pelargonidin	0	0	0	0	0
M00661	Paspaline biosynthesis, geranylgeranyl-PP + indoleglycerol phosphate => paspaline	0	0	0	0	0
M00370	Glucosinolate biosynthesis, tryptophan => glucobrassicin	0	0	0	0	0
M00814	Acarbose biosynthesis, sedoheptulopyranose-7P => acarbose	0	0	0	0	0
M00815	Validamycin A biosynthesis, sedoheptulopyranose-7P => validamycin A	0	0	0	0	0
M00786	Fumitremorgin alkaloid biosynthesis, tryptophan + proline => fumitremorgin C/A	0	0	0	0	0
M00789	Rebeccamycin biosynthesis, tryptophan => rebeccamycin	16.7	16.7	16.7	16.7	16.7
M00790	Pyrrolnitrin biosynthesis, tryptophan => pyrrolnitrin	25	25	25	25	25
M00805	Staurosporine biosynthesis, tryptophan => staurosporine	0	0	0	0	0
M00808	Violacein biosynthesis, tryptophan => violacein	0	100	100	100	100
M00835	Pyocyanine biosynthesis, chorismate => pyocyanine	14.3	0	0	14.3	0
M00837	Prodigiosin biosynthesis, L-proline => prodigiosin	0	0	0	0	0
M00838	Undecylprodigiosin biosynthesis, L-proline => undecylprodigiosin	0	0	0	0	0
M00785	Cycloserine biosynthesis, arginine/serine => cycloserine	0	0	0	0	0
M00787	Bacilysin biosynthesis, prephenate => bacilysin	0	0	0	0	0
M00788	Terpentecin biosynthesis, GGAP => terpentecin	0	0	0	0	0
M00819	Pentalenolactone biosynthesis, farnesyl-PP => pentalenolactone	0	0	0	0	0
M00848	Aurachin biosynthesis, anthranilate => aurachin A	0	0	0	0	0
M00538	Toluene degradation, toluene => benzoate	33.3	33.3	33.3	33.3	33.3
M00537	Xylene degradation, xylene => methylbenzoate	33.3	33.3	33.3	33.3	33.3
M00419	Cymene degradation, p-cymene => p-cumate	0	0	0	0	0
M00547	Benzene/toluene degradation, benzene => catechol / toluene => 3-methylcatechol	0	0	0	0	0
M00548	Benzene degradation, benzene => catechol	0	0	0	0	0
M00551	Benzoate degradation, benzoate => catechol / methylbenzoate => methylcatechol	0	0	100	0	0
M00637	Anthranilate degradation, anthranilate => catechol	0	0	0	0	0
M00568	Catechol ortho-cleavage, catechol => 3-oxoadipate	25	25	100	25	25
M00569	Catechol meta-cleavage, catechol => acetyl-CoA / 4-methylcatechol => propanoyl-CoA	40	40	40	14.3	0
M00539	Cumate degradation, p-cumate => 2-oxopent-4-enoate + 2-methylpropanoate	0	0	0	0	0
M00543	Biphenyl degradation, biphenyl => 2-oxopent-4-enoate + benzoate	0	0	0	0	0
M00544	Carbazole degradation, carbazole => 2-oxopent-4-enoate + anthranilate	0	0	0	0	0
M00418	Toluene degradation, anaerobic, toluene => benzoyl-CoA	0	0	0	0	0
M00541	Benzoyl-CoA degradation, benzoyl-CoA => 3-hydroxypimeloyl-CoA	0	0	0	0	0
M00540	Benzoate degradation, cyclohexanecarboxylic acid =>pimeloyl-CoA	0	0	0	0	20
M00534	Naphthalene degradation, naphthalene => salicylate	0	0	0	0	0
M00638	Salicylate degradation, salicylate => gentisate	0	0	0	0	0
M00624	Terephthalate degradation, terephthalate => 3,4-dihydroxybenzoate	0	0	0	0	0
M00623	Phthalate degradation, phthalate => protocatechuate	0	0	0	0	0
M00636	Phthalate degradation, phthalate => protocatechuate	0	0	0	0	0
M00161	Photosystem II	0	0	0	0	0
M00163	Photosystem I	0	0	0	0	0
M00597	Anoxygenic photosystem II	0	0	0	0	0
M00598	Anoxygenic photosystem I	0	0	0	0	0
M00144	NADH:quinone oxidoreductase, prokaryotes	100	100	100	100	58.3
M00145	NADPH:quinone oxidoreductase, chloroplasts and cyanobacteria	0	0	0	0	0
M00142	NADH:ubiquinone oxidoreductase, mitochondria	0	0	0	0	0
M00143	NADH dehydrogenase ubiquinone Fe-S protein/flavoprotein complex, mitochondria	0	0	0	0	0
M00146	NADH dehydrogenase ubiquinone 1 alpha subcomplex	0	0	0	0	0
M00147	NADH dehydrogenase ubiquinone 1 beta subcomplex	0	0	0	0	0
M00149	Succinate dehydrogenase, prokaryotes	100	100	100	100	50
M00150	Fumarate reductase, prokaryotes	0	0	0	0	0
M00148	Succinate dehydrogenase ubiquinone	0	0	0	0	0
M00162	Cytochrome b6f complex	0	0	0	0	0
M00151	Cytochrome bc1 complex respiratory unit	100	100	100	100	66.7
M00152	Cytochrome bc1 complex	30	30	30	30	20
M00154	Cytochrome c oxidase	20	20	20	20	13.3
M00155	Cytochrome c oxidase, prokaryotes	100	100	100	100	66.7
M00153	Cytochrome bd ubiquinol oxidase	100	0	0	66.7	66.7
M00417	Cytochrome o ubiquinol oxidase	100	100	100	100	50
M00416	Cytochrome aa3-600 menaquinol oxidase	0	0	0	0	0
M00156	Cytochrome c oxidase, cbb3-type	100	100	100	100	75
M00157	F-type ATPase, prokaryotes and chloroplasts	100	100	100	100	25
M00158	F-type ATPase, eukaryotes	0	0	0	0	0
M00159	V/A-type ATPase, prokaryotes	0	0	0	0	0
M00160	V-type ATPase, eukaryotes	0	0	0	0	0
M00260	DNA polymerase III complex, bacteria	100	100	100	100	100
M00264	DNA polymerase II complex, archaea	0	0	0	0	0
M00261	DNA polymerase alpha / primase complex	0	0	0	0	0
M00262	DNA polymerase delta complex	0	0	0	0	0
M00263	DNA polymerase epsilon complex	0	0	0	0	0
M00293	DNA polymerase zeta complex	0	0	0	0	0
M00294	DNA polymerase gamma complex	0	0	0	0	0
M00284	Origin recognition complex	0	0	0	0	0
M00285	MCM complex	0	0	0	0	0
M00286	GINS complex	0	0	0	0	0
M00288	RPA complex	0	0	0	0	0
M00289	RF-C complex	0	0	0	0	0
M00424	Shelterin complex	0	0	0	0	0
M00296	BER complex	0	0	0	0	0
M00290	Holo-TFIIH complex	10	10	10	10	10
M00291	MRN complex	0	0	0	0	0
M00292	MRX complex	0	0	0	0	0
M00297	DNA-PK complex	0	0	0	0	0
M00295	BRCA1-associated genome surveillance complex BASC	0	0	0	0	0
M00413	FA core complex	0	0	0	0	0
M00414	Bloom's syndrome complex	0	0	0	0	0
M00183	RNA polymerase, bacteria	100	100	100	100	25
M00184	RNA polymerase, archaea	0	0	0	0	0
M00180	RNA polymerase II, eukaryotes	0	0	0	0	0
M00181	RNA polymerase III, eukaryotes	0	0	0	0	0
M00182	RNA polymerase I, eukaryotes	0	0	0	0	0
M00351	Spliceosome, U1-snRNP	0	0	0	0	0
M00352	Spliceosome, U2-snRNP	0	0	0	0	0
M00354	Spliceosome, U4/U6.U5 tri-snRNP	0	0	0	0	0
M00355	Spliceosome, 35S U5-snRNP	0	0	0	0	0
M00353	Spliceosome, Prp19/CDC5L complex	0	0	0	0	0
M00396	Lsm 2-8 complex	0	0	0	0	0
M00397	Lsm 1-7 complex	0	0	0	0	0
M00398	Sm core complex	0	0	0	0	0
M00399	Cap binding complex	0	0	0	0	0
M00425	H/ACA ribonucleoprotein complex	0	0	0	0	0
M00426	Survival motor neuron SMN complex	0	0	0	0	0
M00427	Nuclear pore complex	0	0	0	0	0
M00428	eIF4F complex	0	0	0	0	0
M00430	Exon junction complex EJC	0	0	0	0	0
M00405	THC complex	0	0	0	0	0
M00406	TREX complex	0	0	0	0	0
M00390	Exosome, archaea	0	0	0	0	0
M00391	Exosome, eukaryotes	0	0	0	0	0
M00392	Ski complex	0	0	0	0	0
M00393	TRAMP complex	0	0	0	0	0
M00394	RNA degradosome	75	75	75	75	75
M00395	Decapping complex	0	0	0	0	0
M90000	Ribosome, prokaryote	62	60.8	63.3	62	3.8
M91000	Ribosome, all	37.7	36.9	38.5	37.7	2.3
M00178	Ribosome, bacteria	94.2	92.3	96.2	94.2	5.8
M00179	Ribosome, archaea	51.7	51.7	53.4	51.7	3.5
M00177	Ribosome, eukaryotes	0	0	0	0	0
M00340	Proteasome, 20S core particle	0	0	0	0	0
M00341	Proteasome, 19S regulatory particle PA700	0	0	0	0	0
M00337	Immunoproteasome	0	0	0	0	0
M00342	Bacterial proteasome	0	0	0	0	0
M00343	Archaeal proteasome	0	0	0	0	0
M00379	SCF-MET30 complex	0	0	0	0	0
M00380	SCF-BTRC complex	0	0	0	0	0
M00381	SCF-SKP2 complex	0	0	0	0	0
M00382	SCF-FBS complex	0	0	0	0	0
M00407	SCF-CDC4 complex	0	0	0	0	0
M00411	SCF-GRR1 complex	0	0	0	0	0
M00383	ECV complex	0	0	0	0	0
M00384	Cul3-SPOP complex	0	0	0	0	0
M00385	Cul4-DDB1-DDB2 complex	0	0	0	0	0
M00386	Cul4-DDB1-CSA complex	0	0	0	0	0
M00387	SCF-FBW7 complex	0	0	0	0	0
M00388	ECS complex	0	0	0	0	0
M00389	APC/C complex	0	0	0	0	0
M00400	p97-Ufd1-Npl4 complex	0	0	0	0	0
M00401	Sec61 complex	0	0	0	0	0
M00402	Translocon-associated protein TRAP complex	0	0	0	0	0
M00403	HRD1/SEL1 ERAD complex	0	0	0	0	0
M00404	COPII complex	0	0	0	0	0
M00408	ESCRT-0 complex	0	0	0	0	0
M00409	ESCRT-I complex	0	0	0	0	0
M00410	ESCRT-II complex	0	0	0	0	0
M00412	ESCRT-III complex	0	0	0	0	0
M00185	Sulfate/thiosulfate transport system	100	100	100	100	100
M00189	Molybdate transport system	100	100	100	100	100
M00423	Molybdate/tungstate transport system	0	0	0	0	0
M00186	Tungstate transport system	0	0	0	0	0
M00438	Nitrate/nitrite transport system	100	100	100	100	100
M00321	Bicarbonate transport system	0	0	0	0	0
M00188	NitT/TauT family transport system	100	100	100	100	100
M00435	Taurine transport system	33.3	0	0	0	0
M00436	Sulfonate transport system	100	100	100	0	100
M00437	Phthalate transport system	0	0	0	0	0
M00190	IronIII transport system	100	100	100	100	100
M00191	Thiamine transport system	0	0	0	0	0
M00299	Spermidine/putrescine transport system	0	0	0	0	0
M00300	Putrescine transport system	100	100	100	100	100
M00193	Putative spermidine/putrescine transport system	0	0	0	0	0
M00301	Mannopine transport system	0	0	0	0	0
M00302	2-Aminoethylphosphonate transport system	0	0	0	0	0
M00208	Glycine betaine/proline transport system	66.7	0	0	33.3	33.3
M00209	Osmoprotectant transport system	66.7	66.7	66.7	66.7	66.7
M00442	Putative hydroxymethylpyrimidine transport system	0	0	0	0	0
M00192	Putative thiamine transport system	0	0	0	0	0
M00194	Maltose/maltodextrin transport system	25	25	25	25	25
M00196	Raffinose/stachyose/melibiose transport system	100	100	100	100	75
M00201	alpha-Glucoside transport system	0	0	0	0	0
M00203	Glucose/arabinose transport system	0	0	0	0	0
M00605	Glucose/mannose transport system	100	100	100	100	100
M00204	Trehalose/maltose transport system	25	25	25	25	25
M00604	Trehalose transport system	0	0	0	0	0
M00205	N-Acetylglucosamine transport system	0	0	0	0	0
M00206	Cellobiose transport system	25	25	25	25	25
M00606	N,N'-Diacetylchitobiose transport system	25	25	25	25	25
M00601	Putative chitobiose transport system	100	100	100	100	100
M00213	L-Arabinose transport system	100	100	100	0	0
M00199	L-Arabinose/lactose transport system	0	0	0	0	0
M00202	Oligogalacturonide transport system	0	0	0	0	0
M00600	alpha-1,4-Digalacturonate transport system	0	0	0	0	0
M00603	Putative aldouronate transport system	0	0	0	0	0
M00214	Methyl-galactoside transport system	0	0	0	0	0
M00215	D-Xylose transport system	100	100	100	100	100
M00619	Xylobiose transport system	0	0	0	0	0
M00216	Multiple sugar transport system	0	0	0	0	0
M00217	D-Allose transport system	0	0	0	0	0
M00218	Fructose transport system	0	0	0	0	0
M00219	AI-2 transport system	0	0	0	0	0
M00220	Rhamnose transport system	0	0	0	0	0
M00212	Ribose transport system	100	100	33.3	33.3	66.7
M00590	Erythritol transport system	0	0	0	0	0
M00591	Putative xylitol transport system	0	0	0	0	0
M00592	Inositol transport system	0	0	0	0	0
M00593	Inositol transport system	0	0	0	0	0
M00599	Inositol-phosphate transport system	0	0	0	0	0
M00197	Putative fructooligosaccharide transport system	25	25	25	25	25
M00607	Glycerol transport system	0	0	0	0	0
M00198	Putative sn-glycerol-phosphate transport system	0	0	0	0	0
M00200	Putative sorbitol/mannitol transport system	25	25	25	25	25
M00602	Arabinosaccharide transport system	25	25	25	25	25
M00669	gamma-Hexachlorocyclohexane transport system	100	100	100	100	100
M00210	Phospholipid transport system	100	100	100	100	80
M00670	Mce transport system	75	75	75	75	75
M00491	Arabinogalactan oligomer/maltooligosaccharide transport system	25	25	25	25	25
M00207	Putative multiple sugar transport system	75	75	100	75	75
M00221	Putative simple sugar transport system	100	100	100	100	100
M00211	Putative ABC transport system	50	50	50	50	50
M00222	Phosphate transport system	100	100	100	100	100
M00223	Phosphonate transport system	100	100	100	100	100
M00225	Lysine/arginine/ornithine transport system	0	0	0	0	0
M00226	Histidine transport system	0	0	0	0	0
M00227	Glutamine transport system	33.3	0	0	0	0
M00229	Arginine transport system	0	0	0	0	0
M00230	Glutamate/aspartate transport system	100	100	25	25	25
M00231	Octopine/nopaline transport system	0	0	0	0	0
M00232	General L-amino acid transport system	0	0	0	0	0
M00233	Glutamate transport system	0	0	0	0	0
M00234	L-Cystine transport system	66.7	66.7	66.7	66.7	66.7
M00585	L-Cystine transport system	0	0	0	0	0
M00235	Arginine/ornithine transport system	0	0	0	0	0
M00587	Arginine/lysine/histidine/glutamine transport system	0	0	0	0	0
M00864	Arginine/lysine/histidine transport system	0	0	0	0	0
M00589	Putative lysine transport system	0	0	0	0	0
M00865	Hydroxyproline transporter system	0	0	0	0	0
M00863	Putative lysine/arginine/ornithine/histidine/octopine transport system	0	0	0	0	0
M00237	Branched-chain amino acid transport system	100	100	100	100	100
M00322	Neutral amino acid transport system	0	0	0	0	0
M00323	Urea transport system	100	100	100	100	100
M00238	D-Methionine transport system	100	100	100	100	66.7
M00228	Aspartate/glutamate/glutamine transport system	0	0	0	0	0
M00586	Putative S-methylcysteine transport system	0	0	0	0	0
M00236	Putative polar amino acid transport system	100	66.7	66.7	66.7	66.7
M00439	Oligopeptide transport system	0	0	0	0	0
M00324	Dipeptide transport system	0	0	0	0	0
M00566	Dipeptide transport system, Firmicutes	0	0	0	0	0
M00739	Cationic peptide transport system	0	0	0	0	0
M00440	Nickel transport system	0	0	0	0	0
M00348	Glutathione transport system	0	0	0	0	0
M00239	Peptides/nickel transport system	100	80	80	80	60
M00349	Microcin C transport system	0	0	0	0	0
M00240	Iron complex transport system	66.7	66.7	66.7	66.7	66.7
M00241	Vitamin B12 transport system	33.3	33.3	33.3	33.3	33.3
M00316	Manganese transport system	0	0	0	0	0
M00242	Zinc transport system	0	0	0	0	0
M00318	Iron/zinc/manganese/copper transport system	0	0	0	0	0
M00317	Manganese/iron transport system	0	0	0	0	0
M00791	Manganese/zinc transport system	0	0	0	0	0
M00792	Manganese/zinc transport system	0	0	0	0	0
M00319	Manganese/zinc/iron transport system	0	0	0	0	0
M00243	Manganese/iron transport system	0	0	0	0	0
M00245	Cobalt/nickel transport system	0	0	100	100	75
M00246	Nickel transport system	0	0	100	100	75
M00581	Biotin transport system	0	0	0	0	0
M00582	Energy-coupling factor transport system	0	0	0	0	0
M00244	Putative zinc/manganese transport system	66.7	66.7	66.7	66.7	66.7
M00247	Putative ABC transport system	33.3	33.3	33.3	33.3	33.3
M00298	Multidrug/hemolysin transport system	0	0	0	0	0
M00249	Capsular polysaccharide transport system	0	0	0	0	0
M00858	Vi polysaccharide transport system	0	0	0	0	0
M00250	Lipopolysaccharide transport system	100	100	100	100	100
M00320	Lipopolysaccharide export system	100	100	100	100	66.7
M00251	Teichoic acid transport system	0	0	0	0	0
M00252	Lipooligosaccharide transport system	0	0	0	0	0
M00253	Sodium transport system	100	100	100	100	100
M00813	Lantibiotic transport system	0	0	0	0	0
M00817	Lantibiotic transport system	0	0	0	0	0
M00762	Copper-processing system	0	0	100	100	100
M00583	Putative peptide transport system	0	0	0	0	0
M00257	Hemin transport system	0	0	0	0	0
M00634	Oleandomycin transport system	0	0	0	0	0
M00747	Bacitracin transport system	0	0	0	0	0
M00314	Bacitracin transport system	0	0	0	0	0
M00731	Bacitracin transport system	0	0	0	0	0
M00732	Cationic antimicrobial peptide transport system	0	0	0	0	0
M00224	Fluoroquinolone transport system	0	0	0	0	0
M00255	Lipoprotein-releasing system	100	100	100	100	100
M00584	Acetoin utilization transport system	0	0	0	0	0
M00259	Heme transport system	0	0	0	0	0
M00256	Cell division transport system	100	100	100	100	100
M00315	Uncharacterized ABC transport system	0	0	0	0	0
M00258	Putative ABC transport system	100	100	100	100	100
M00254	ABC-2 type transport system	100	100	100	100	100
M00635	Tetracycline resistance, TetAB46 transporter	0	0	0	0	0
M00720	Multidrug resistance, efflux pump VexEF-TolC	33.3	33.3	33.3	33.3	33.3
M00821	Multidrug resistance, efflux pump TriABC-TolC	25	25	25	25	25
M00822	Multidrug resistance, efflux pump MexMN-OprM	33.3	33.3	33.3	33.3	33.3
M00706	Multidrug resistance, EfrAB transporter	0	0	0	0	0
M00707	Multidrug resistance, MdlAB/SmdAB transporter	100	100	100	100	100
M00708	Multidrug resistance, PatAB transporter	0	0	0	0	0
M00710	Multidrug resistance, efflux pump EbrAB	0	0	0	0	0
M00711	Multidrug resistance, efflux pump MdtIJ	0	0	0	0	0
M00712	Multidrug resistance, efflux pump YkkCD	0	0	0	0	0
M00265	PTS system, glucose-specific II component	0	0	0	0	0
M00809	PTS system, glucose-specific II component	0	0	0	0	0
M00267	PTS system, N-acetylglucosamine-specific II component	0	0	0	0	0
M00266	PTS system, maltose/glucose-specific II component	0	0	0	0	0
M00806	PTS system, maltose-specific II component	0	0	0	0	0
M00282	PTS system, D-glucosamine-specific II component	0	0	0	0	0
M00269	PTS system, sucrose-specific II component	0	0	0	0	0
M00271	PTS system, beta-glucoside-specific II component	0	0	0	0	0
M00272	PTS system, beta-glucoside arbutin/salicin/cellobiose-specific II component	0	0	0	0	0
M00270	PTS system, trehalose-specific II component	0	0	0	0	0
M00303	PTS system, N-acetylmuramic acid-specific II component	0	0	0	0	0
M00268	PTS system, alpha-glucoside-specific II component	0	0	0	0	0
M00273	PTS system, fructose-specific II component	0	0	0	0	0
M00306	PTS system, fructose-specific II-like component	0	0	0	0	0
M00274	PTS system, mannitol-specific II component	0	0	0	0	0
M00305	PTS system, 2-O-A-mannosyl-D-glycerate-specific II component	0	0	0	0	0
M00281	PTS system, lactose-specific II component	0	0	0	0	0
M00275	PTS system, cellobiose-specific II component	0	0	0	0	0
M00280	PTS system, glucitol/sorbitol-specific II component	0	0	0	0	0
M00279	PTS system, galactitol-specific II component	0	0	0	0	0
M00807	PTS system, galactose-specific II component	0	0	0	0	0
M00276	PTS system, mannose-specific II component	0	0	0	0	0
M00764	PTS system, fructoselysine/glucoselysine-specific II component	0	0	0	0	0
M00304	PTS system, fructose-specific II component	0	0	0	0	0
M00278	PTS system, sorbose-specific II component	0	0	0	0	0
M00277	PTS system, N-acetylgalactosamine-specific II component	0	0	0	0	0
M00287	PTS system, galactosamine-specific II component	0	0	0	0	0
M00610	PTS system, D-glucosaminate-specific II component	0	0	0	0	0
M00283	PTS system, ascorbate-specific II component	33.3	33.3	33.3	33.3	33.3
M00325	alpha-Hemolysin/cyclolysin transport system	100	33.3	66.7	33.3	66.7
M00326	RTX toxin transport system	25	25	50	25	25
M00327	S-Layer protein transport system	0	0	0	0	0
M00328	Hemophore/metalloprotease transport system	100	100	100	100	100
M00329	Multiple protein transport system	0	0	0	0	0
M00330	Adhesin protein transport system	0	0	0	0	0
M00571	AlgE-type Mannuronan C-5-Epimerase transport system	33.3	33.3	33.3	33.3	33.3
M00339	RaxAB-RaxC type I secretion system	33.3	100	100	100	33.3
M00331	Type II general secretion pathway	100	100	100	100	83.3
M00332	Type III secretion system	100	0	88.9	0	88.9
M00333	Type IV secretion system	83.3	100	0	0	0
M00334	Type VI secretion system	92.3	100	100	100	100
M00335	Sec secretion system	88.9	100	100	77.8	77.8
M00336	Twin-arginine translocation Tat system	100	100	100	100	50
M00429	Competence-related DNA transformation transporter	25	25	25	25	25
M00360	Aminoacyl-tRNA biosynthesis, prokaryotes	100	100	100	100	83.3
M00359	Aminoacyl-tRNA biosynthesis, eukaryotes	90	90	90	90	75
M00362	Nucleotide sugar biosynthesis, prokaryotes	71.4	85.7	85.7	85.7	85.7
M00361	Nucleotide sugar biosynthesis, eukaryotes	50	66.7	66.7	66.7	66.7
M00434	PhoR-PhoB phosphate starvation response two-component regulatory system	100	100	100	100	50
M00443	SenX3-RegX3 phosphate starvation response two-component regulatory system	0	0	0	0	0
M00444	PhoQ-PhoP magnesium transport two-component regulatory system	0	0	0	0	0
M00445	EnvZ-OmpR osmotic stress response two-component regulatory system	100	100	100	100	50
M00446	RstB-RstA two-component regulatory system	50	50	50	50	50
M00447	CpxA-CpxR envelope stress response two-component regulatory system	50	50	50	50	50
M00448	CssS-CssR secretion stress response two-component regulatory system	0	0	0	0	0
M00449	CreC-CreB phosphate regulation two-component regulatory system	100	0	0	0	0
M00450	BaeS-BaeR envelope stress response two-component regulatory system	100	100	100	100	100
M00451	BasS-BasR antimicrobial peptide resistance two-component regulatory system	0	0	0	0	0
M00452	CusS-CusR copper tolerance two-component regulatory system	100	100	100	100	100
M00453	QseC-QseB quorum sensing two-component regulatory system	100	100	100	100	100
M00454	KdpD-KdpE potassium transport two-component regulatory system	100	100	100	100	100
M00455	TorS-TorR TMAO respiration two-component regulatory system	0	0	0	0	0
M00456	ArcB-ArcA anoxic redox control two-component regulatory system	0	0	0	0	0
M00457	TctE-TctD tricarboxylic acid transport two-component regulatory system	100	100	100	100	100
M00458	ResE-ResD aerobic and anaerobic respiration two-component regulatory system	0	0	0	0	0
M00459	VicK-VicR cell wall metabolism two-component regulatory system	50	50	50	50	50
M00460	MprB-MprA maintenance of persistent infection two-component regulatory system	50	50	0	50	50
M00461	MtrB-MtrA osmotic stress response two-component regulatory system	0	0	0	0	0
M00462	PrrB-PrrA intracellular multiplication two-component regulatory system	0	0	0	0	0
M00463	TrcS-TrcR two-component regulatory system	0	0	0	0	0
M00464	NrsS-NrsR nickel tolerance two-component regulatory system	0	0	0	0	0
M00465	ManS-ManR manganese homeostasis two-component regulatory system	0	0	0	0	0
M00466	NblS-NblR photosynthesis two-component regulatory system	0	0	0	0	0
M00467	SasA-RpaAB circadian timing mediating two-component regulatory system	0	0	0	0	0
M00468	SaeS-SaeR staphylococcal virulence regulation two-component regulatory system	0	0	0	0	0
M00469	BceS-BceR bacitracin transport two-component regulatory system	0	0	0	0	0
M00470	YxdK-YxdJ antimicrobial peptide response two-component regulatory system	0	0	0	0	0
M00471	NarX-NarL nitrate respiration two-component regulatory system	0	100	100	100	100
M00472	NarQ-NarP nitrate respiration two-component regulatory system	0	0	0	0	0
M00473	UhpB-UhpA hexose phosphates uptake two-component regulatory system	50	50	50	50	50
M00474	RcsC-RcsD-RcsB capsule synthesis two-component regulatory system	0	0	0	0	0
M00475	BarA-UvrY central carbon metabolism two-component regulatory system	50	50	50	50	50
M00476	ComP-ComA competence two-component regulatory system	0	0	0	0	0
M00477	EvgS-EvgA acid and drug tolerance two-component regulatory system	0	0	0	0	0
M00478	DegS-DegU multicellular behavior control two-component regulatory system	50	50	0	50	50
M00479	DesK-DesR membrane lipid fluidity regulation two-component regulatory system	0	100	100	100	100
M00480	VraS-VraR cell-wall peptidoglycan synthesis two-component regulatory system	0	0	0	0	0
M00481	LiaS-LiaR cell wall stress response two-component regulatory system	0	50	50	50	0
M00482	DevS-DevR redox response two-component regulatory system	0	0	0	0	0
M00483	NreB-NreC dissimilatory nitrate/nitrite reduction two-component regulatory system	0	0	0	0	0
M00484	YdfH-YdfI two-component regulatory system	0	0	0	0	0
M00485	KinABCDE-Spo0FA sporulation control two-component regulatory system	0	0	0	0	0
M00486	CitA-CitB citrate fermentation two-component regulatory system	0	0	0	0	0
M00487	CitS-CitT magnesium-citrate transport two-component regulatory system	0	0	0	0	0
M00488	DcuS-DcuR C4-dicarboxylate metabolism two-component regulatory system	0	0	0	0	0
M00489	DctS-DctR C4-dicarboxylate transport two-component regulatory system	0	0	0	0	0
M00490	MalK-MalR malate transport two-component regulatory system	0	0	0	0	0
M00492	LytS-LytR two-component regulatory system	0	50	0	0	0
M00493	AlgZ-AlgR alginate production two-component regulatory system	0	50	100	50	0
M00494	NatK-NatR sodium extrusion two-component regulatory system	0	0	0	0	0
M00495	AgrC-AgrA exoprotein synthesis two-component regulatory system	0	0	0	0	0
M00812	AgrC2-AgrA2 virulence regulation two-component regulatory system	0	0	0	0	0
M00496	ComD-ComE competence two-component regulatory system	0	0	0	0	0
M00497	GlnL-GlnG nitrogen regulation two-component regulatory system	100	100	100	100	100
M00498	NtrY-NtrX nitrogen regulation two-component regulatory system	0	0	0	0	0
M00499	HydH-HydG metal tolerance two-component regulatory system	0	0	0	0	50
M00500	AtoS-AtoC cPHB biosynthesis two-component regulatory system	0	0	0	0	0
M00501	PilS-PilR type 4 fimbriae synthesis two-component regulatory system	100	100	100	100	100
M00502	GlrK-GlrR amino sugar metabolism two-component regulatory system	100	100	100	100	100
M00503	PgtB-PgtA phosphoglycerate transport two-component regulatory system	0	0	0	0	0
M00504	DctB-DctD C4-dicarboxylate transport two-component regulatory system	100	100	100	100	100
M00505	KinB-AlgB alginate production two-component regulatory system	0	0	0	0	0
M00772	HupT-HupR hydrogenase synthesis regulation two-component regulatory system	0	0	0	0	0
M00506	CheA-CheYBV chemotaxis two-component regulatory system	100	100	100	100	100
M00507	ChpA-ChpB/PilGH chemosensory two-component regulatory system	80	80	80	80	60
M00508	PixL-PixGH positive phototaxis two-component regulatory system	0	0	0	0	0
M00509	WspE-WspRF chemosensory two-component regulatory system	100	100	100	100	100
M00510	Cph1-Rcp1 light response two-component regulatory system	0	0	0	0	0
M00511	PleC-PleD cell fate control two-component regulatory system	25	25	25	0	25
M00662	Hk1-Rrp1 glycerol uptake and utilization two-component regulatory system	0	0	0	0	0
M00512	CckA-CtrA/CpdR cell cycle control two-component regulatory system	33.3	33.3	0	0	0
M00513	LuxQN/CqsS-LuxU-LuxO quorum sensing two-component regulatory system	25	25	25	25	25
M00514	TtrS-TtrR tetrathionate respiration two-component regulatory system	50	50	0	50	50
M00515	FlrB-FlrC polar flagellar synthesis two-component regulatory system	0	0	0	0	0
M00516	SLN1-YPD1-SSK1/SKN7 osmosensing two-component regulatory system	0	0	0	0	0
M00517	RpfC-RpfG cell-to-cell signaling two-component regulatory system	0	0	0	0	0
M00518	GlnK-GlnL glutamine utilization two-component regulatory system	0	0	0	0	0
M00519	YesM-YesN two-component regulatory system	50	50	0	0	0
M00520	ChvG-ChvI acidity sensing two-component regulatory system	0	0	0	0	0
M00521	CiaH-CiaR two-component regulatory system	0	0	0	0	0
M00522	SalK-SalR two-component regulatory system	0	0	0	0	0
M00523	RegB-RegA redox response two-component regulatory system	100	100	100	100	50
M00524	FixL-FixJ nitrogen fixation two-component regulatory system	50	50	50	50	50
M00663	SsrA-SsrB two-component regulatory system	0	0	0	0	0
M00653	AauS-AauR acidic amino acids utilization two-component regulatory system	0	0	0	0	0
M00654	ParS-ParR polymyxin-adaptive resistance two-component regulatory system	0	0	0	0	0
M00655	AdeS-AdeR two-component regulatory system	0	100	0	100	100
M00656	VanS-VanR VanB type vancomycin resistance two-component regulatory system	0	0	0	0	0
M00657	VanS-VanR VanE type vancomycin resistance two-component regulatory system	0	0	0	0	0
M00658	VanS-VanR actinomycete type vancomycin resistance two-component regulatory system	0	0	0	0	0
M00716	ArlS-ArlR virulence regulation two-component regulatory system	0	0	0	0	0
M00719	Ihk-Irr virulence regulation two-component regulatory system	0	0	0	0	0
M00733	GraS-GraR cationic antimicrobial peptide transport two-component regulatory system	0	0	0	0	0
M00734	BraS-BraR bacitracin transport two-component regulatory system	0	0	0	0	0
M00770	PfeS-PfeR enterobactin-dependent iron acquisition two-component regulatory system	0	0	0	0	0
M00771	FitF-FitH insecticidal toxin regulation two-component regulatory system	0	0	0	0	0
M00816	NisK-NisR lantibiotic biosynthesis two-component regulatory system	0	0	0	0	0
M00818	FusK-FusR virulence regulation two-component regulatory system	50	0	0	0	0
M00820	SagS-HptB-HsbR swarming activity and biofilm formation two-component regulatory system	100	100	0	100	100
M00839	PdtaS-PdtaR two-component regulatory system	50	50	50	50	50
M00668	Tetracycline resistance, TetA transporter	50	50	50	50	50
M00667	Tetracycline resistance, efflux pump	0	0	0	0	0
M00709	Macrolide resistance, MacAB-TolC transporter	0	0	0	0	0
M00715	Lincosamide resistance, efflux pump LmrB	50	50	50	50	50
M00713	Fluoroquinolone resistance, efflux pump LfrA	0	0	0	0	0
M00737	Bacitracin resistance, VraDE transporter	0	0	0	0	0
M00738	Bacitracin resistance, BceAB transporter	0	0	0	0	0
M00645	Multidrug resistance, efflux pump SmeABC	66.7	66.7	66.7	66.7	66.7
M00646	Multidrug resistance, efflux pump AcrAD-TolC	66.7	66.7	66.7	66.7	66.7
M00647	Multidrug resistance, efflux pump AcrAB-TolC/SmeDEF	100	100	50	100	100
M00648	Multidrug resistance, efflux pump MdtABC	100	100	100	100	100
M00699	Multidrug resistance, efflux pump AmeABC	0	0	0	0	0
M00701	Multidrug resistance, efflux pump EmrAB	100	100	100	100	100
M00765	Multidrug resistance, efflux pump Bmr	0	0	0	0	0
M00767	Multidrug resistance, efflux pump OqxAB	0	0	0	0	0
M00644	Vanadium resistance, efflux pump MexGHI-OpmD	0	0	33.3	0	0
M00717	Multidrug resistance, efflux pump NorA	50	0	0	0	0
M00768	Multidrug resistance, efflux pump GesABC	0	0	0	0	0
M00628	beta-Lactam resistance, AmpC system	75	75	75	75	75
M00742	Aminoglycoside resistance, protease FtsH	100	100	100	100	100
M00743	Aminoglycoside resistance, protease HtpX	100	100	100	100	66.7
M00760	Erythromycin resistance, macrolide 2'-phosphotransferase I MphA	0	0	0	0	0
M00766	Streptomycin resistance, deactivating enzyme StrAB	0	0	0	0	0
M00729	Fluoroquinolone resistance, gyrase-protecting protein Qnr	66.7	66.7	66.7	66.7	33.3
M00721	Cationic antimicrobial peptide CAMP resistance, arnBCADTEF operon	0	0	0	0	0
M00722	Cationic antimicrobial peptide CAMP resistance, ethanolaminephosphotransferase EptA	0	0	0	0	0
M00723	Cationic antimicrobial peptide CAMP resistance, ethanolaminephosphotransferase EptB	0	0	0	0	0
M00724	Cationic antimicrobial peptide CAMP resistance, palmitoyl transferase PagP	0	0	0	0	0
M00727	Cationic antimicrobial peptide CAMP resistance, N-acetylmuramoyl-L-alanine amidase AmiA and AmiC	66.7	66.7	66.7	66.7	66.7
M00728	Cationic antimicrobial peptide CAMP resistance, envelope protein folding and degrading factors DegP and DsbA	66.7	66.7	66.7	66.7	66.7
M00754	Nisin resistance, phage shock protein homolog LiaH	0	33.3	33.3	33.3	0
M00687	MAPK ERK1/2 signaling	0	0	0	0	0
M00688	MAPK JNK signaling	0	0	0	0	0
M00689	MAPK p38 signaling	0	0	0	0	0
M00690	MAPK ERK5 signaling	0	0	0	0	0
M00677	Wnt signaling	0	0	0	0	0
M00682	Notch signaling	0	0	0	0	0
M00678	Hedgehog signaling	0	0	0	0	0
M00679	BMP signaling	0	0	0	0	0
M00680	TGF-beta signaling	0	0	0	0	0
M00681	Activin signaling	0	0	0	0	0
M00683	Hippo signaling	0	0	0	0	0
M00684	JAK-STAT signaling	0	0	0	0	0
M00695	cAMP signaling	33.3	33.3	33.3	33.3	33.3
M00694	cGMP signaling	0	0	0	0	0
M00676	PI3K-Akt signaling	0	0	0	0	0
M00691	DNA damage-induced cell cycle checkpoints	0	0	0	0	0
M00692	Cell cycle - G1/S transition	0	0	0	0	0
M00693	Cell cycle - G2/M transition	0	0	0	0	0
M00685	Apoptotic machinery	0	0	0	0	0
M00686	Toll-like receptor signaling	0	0	0	0	0
M00852	Vibrio cholerae pathogenicity signature, toxin coregulated pilus	0	0	0	0	0
M00850	Vibrio cholerae pathogenicity signature, cholera toxins	0	0	16.7	16.7	0
M00542	EHEC/EPEC pathogenicity signature, T3SS and effectors	0	0	0	0	0
M00363	EHEC pathogenicity signature, Shiga toxin	0	0	0	0	0
M00853	ETEC pathogenicity signature, colonization factors	0	0	0	0	0
M00576	ETEC pathogenicity signature, heat-labile and heat-stable enterotoxins	0	0	0	0	0
M00856	Salmonella enterica pathogenicity signature, typhoid toxin	0	0	0	0	0
M00857	Salmonella enterica pathogenicity signature, Vi antigen	0	0	0	0	0
M00575	Pertussis pathogenicity signature, T1SS	60	20	40	20	40
M00574	Pertussis pathogenicity signature, pertussis toxin	0	0	0	0	0
M00564	Helicobacter pylori pathogenicity signature, cagA pathogenicity island	4.3	4.3	0	0	0
M00859	Bacillus anthracis pathogenicity signature, anthrax toxin	0	0	0	0	0
M00860	Bacillus anthracis pathogenicity signature, polyglutamic acid capsule biosynthesis	0	0	0	0	0
M00851	Carbapenem resistance	0	0	0	0	0
M00625	Methicillin resistance	0	0	0	0	0
M00627	beta-Lactam resistance, Bla system	33.3	33.3	33.3	33.3	33.3
M00745	Imipenem resistance, repression of porin OprD	100	100	100	100	100
M00651	Vancomycin resistance, D-Ala-D-Lac type	14.3	14.3	14.3	14.3	14.3
M00652	Vancomycin resistance, D-Ala-D-Ser type	0	0	0	0	0
M00704	Tetracycline resistance, efflux pump Tet38	50	0	0	0	0
M00725	Cationic antimicrobial peptide CAMP resistance, dltABCD operon	0	0	0	0	0
M00726	Cationic antimicrobial peptide CAMP resistance, lysyl-phosphatidylglycerol L-PG synthase MprF	0	0	0	0	0
M00730	Cationic antimicrobial peptide CAMP resistance, VraFG transporter	0	0	0	0	0
M00744	Cationic antimicrobial peptide CAMP resistance, protease PgtE	0	0	0	0	0
M00718	Multidrug resistance, efflux pump MexAB-OprM	50	50	50	50	50
M00639	Multidrug resistance, efflux pump MexCD-OprJ	0	0	0	0	0
M00641	Multidrug resistance, efflux pump MexEF-OprN	0	0	0	0	0
M00642	Multidrug resistance, efflux pump MexJK-OprM	50	0	0	0	0
M00643	Multidrug resistance, efflux pump MexXY-OprM	0	0	0	0	0
M00769	Multidrug resistance, efflux pump MexPQ-OpmE	33.3	33.3	66.7	33.3	33.3
M00649	Multidrug resistance, efflux pump AdeABC	0	100	0	100	66.7
M00696	Multidrug resistance, efflux pump AcrEF-TolC	0	0	0	0	0
M00697	Multidrug resistance, efflux pump MdtEF-TolC	0	0	0	0	0
M00698	Multidrug resistance, efflux pump BpeEF-OprC	100	100	100	100	100
M00700	Multidrug resistance, efflux pump AbcA	50	0	0	0	0
M00702	Multidrug resistance, efflux pump NorB	50	0	0	0	0
M00714	Multidrug resistance, efflux pump QacA	0	0	0	0	0
M00705	Multidrug resistance, efflux pump MepA	0	0	0	0	0
M00746	Multidrug resistance, repression of porin OmpF	0	0	0	0	0
M00660	Xanthomonas spp. pathogenicity signature, T3SS and effectors	0	0	0	0	0
M00664	Nodulation	25	0	0	0	0
M00611	Oxygenic photosynthesis in plants and cyanobacteria	66.7	66.7	66.7	66.7	41.7
M00612	Anoxygenic photosynthesis in purple bacteria	66.7	66.7	66.7	66.7	41.7
M00613	Anoxygenic photosynthesis in green nonsulfur bacteria	21.4	21.4	21.4	21.4	7.1
M00614	Anoxygenic photosynthesis in green sulfur bacteria	66.7	66.7	66.7	66.7	41.7
M00617	Methanogen	33.3	33.3	33.3	33.3	33.3
M00618	Acetogen	44.4	44.4	44.4	44.4	33.3
M00615	Nitrate assimilation	66.7	66.7	66.7	66.7	66.7
M00616	Sulfate-sulfur assimilation	100	100	100	100	50
Stains: R1T. Duganella sp. R1T; R64T. Duganella sp. R64T; HSC-15S17T. Duganella violaceipulchra HSC-15S17T; R57T. Duganella sp. R57T; FT81WT. Duganella vulcania FT81WT.

## Sheet: Table S5
Table S5 ANIb and dDDH values among strains R1T, R57T, R64T, and their related strains
		ANIb %			dDDH %
		R1T	R57T	R64T	R1T	R57T	R64T
Duganella sp. R1T	GCF_040369125.1	—	86.12	86.43	—	32.4	33.5
Duganella sp. R64T	GCA_040364205.1	86.32	89.56	—	33.5	40.3	—
Duganella violaceipulchra HSC–15S17T	GCF_019166075.1	86.02	89.42	92.8	33.2	40.2	52.7
"Duganella aquatica" FT29WT	GCF_009380215.1	85.96	88.49	89.04	32.8	37.9	39.9
"Duganella aquatica" FT103WT	GCF_009380165.1	85.9	88.68	89.19	33	38.1	40.3
Duganella sp. R57T	GCA_040362985.1	85.65	—	89.2	32.4	—	40.3
Duganella vulcania FT81WT	GCF_009857655.1	85.61	95.68	89.29	32.8	67.9	40.6
"Duganella aceris" SAP-35T	GCF_011090165.1	84.03	83.73	83.83	29.7	29	29.4
Duganella aquatilis FT26WT	GCF_009674565.1	82.5	82.55	82.34	27.3	26.9	27
Duganella alba FT9WT	GCF_009674495.1	82.31	82.37	82.13	27	26.7	26.6
Duganella radicis KCTC 23382T	GCF_009720825.1	81.48	81.95	81.6	25.7	25.8	25.7
Duganella margarita FT109WT	GCF_009857535.1	81.45	81.49	81.38	25.9	25.8	25.6
Duganella callida DN04T	GCF_004614165.1	81.36	81.71	81.11	26.1	25.9	25.7
Duganella levis CY42WT	GCF_009857605.1	81.28	81.47	81.27	25.6	25.6	25.6
Duganella dendranthematis AF9R3T	GCF_012849375.1	81.27	81.24	81.2	25.6	25.4	25.5
Duganella rivi FT55WT	GCF_009857435.1	81.03	81.13	81.01	25	25.1	24.9
Duganella lactea FT50WT	GCF_009857505.1	81	81.31	80.81	25.8	25.7	25.5
Duganella sacchari Sac-22T	GCF_900143065.1	80.91	80.86	80.58	24.8	24.8	24.7
Duganella guangzhouensis FT80WT	GCF_009674535.1	80.76	81.09	80.69	25.1	24.9	25
Duganella flavida FT135WT	GCF_009857445.1	80.74	80.94	80.75	24.6	24.6	24.6
Rugamonas rubra ATCC 43154T	GCF_900114705.1	80.01	80.46	80.08	25.2	25.3	25.1
Rugamonas violacea CCM 8940T	GCF_016461825.1	79.99	80.36	79.8	25.3	25.3	25.2
Rugamonas brunnea LX20WT	GCF_014042345.1	79.53	79.98	79.43	24.7	24.6	24.4
Duganella zoogloeoides ATCC 25935T	GCF_034479515.1	79.49	79.77	79.48	24.5	24.3	24.2
Duganella phyllosphaerae T54T	GCF_001758785.1	79.35	79.64	79.47	24.1	24.1	24.2
Rugamonas fusca FT3ST	GCF_014042365.1	79.35	79.8	79.42	24.3	24.4	24.2
Rugamonas apoptosis LX47WT	GCF_014042355.1	79.1	79.46	79.03	24.4	24.5	24.2
Duganella fentianensis FT93WT	GCF_009857835.1	78.98	79.48	79.3	23.8	24	23.6
Duganella qianjiadongensis CY13WT	GCF_009857915.1	78.79	79.23	79.04	23.6	24	23.6
Duganella danionis CCM 8698T	GCF_042658625.1	78.66	79.19	79.01	23.5	23.8	23.5
ANIb values were calculated in a single direction.

## Sheet: Table S6
Table S6 Chemotaxonomic characteristics among strains R1T, R64T, HSC-15S17T, R57T, and FT81WT
Characteristic	R1T	R64T	HSC-15S17T	R57T	FT81WT
Reaction/Enzyme
Denitrification	-	-	-	+	+
Indole production	-	-	-	-	-
Fermentation	-	-	-	-	-
Arginine Dihydrolase	-	-	-	-	-
UREase	-	-	-	-	-
Hydrolysis β-glucosidase	+	+	+	+	+
Hydrolysis protease	-	-	-	+	+
β-galactosidase	+	+	+	+	+
Carbon source utilization
Dextrin	-	-	-	+	+
D-Maltose	-	-	-	-	+
D-Trehalose	-	-	-	+	+
D-Cellobiose	-	-	-	+	-
Gentiobiose	-	-	-	+	-
Sucrose	-	-	-	+	-
D-Turanose	-	-	-	+	-
Stachyose	-	-	-	+	+
D-Raffinose	-	-	-	-	-
α-D-Lactose	-	-	-	+	+
D-Melibiose	-	+	-	+	+
β-Methyl-D-Glucoside	-	+	-	-	+
D-Salicin	-	-	-	+	+
N-Acetyl-D-Glucosamine	-	-	-	+	+
N-Acetyl-β-D-Mannosamine	-	-	-	+	+
N-Acetyl-D-Galactosamine	-	-	-	+	+
N-Acetyl Neuraminic Acid	-	-	-	+	+
α-D-Glucose	-	-	-	+	+
D-Mannose	+	+	-	+	+
D-Fructose	-	+	-	+	+
D-Galactose	+	+	-	+	+
3-Methyl Glucose	-	+	-	+	+
D-Fucose	+	+	-	+	+
L-Fucose	+	-	-	+	+
L-Rhamnose	+	-	-	+	+
Inosine	-	+	-	+	+
D-Sorbitol	-	-	-	-	-
D-Mannitol	-	-	-	+	+
D-Arabitol	-	+	-	-	+
myo-Inositol	-	-	-	+	+
Glycerol	-	-	-	+	+
D-Glucose-6-PO4	-	-	-	+	+
D-Fructose-6-PO4	-	+	+	-	+
D-Aspartic Acid	-	-	-	-	-
D-Serine	-	-	-	-	-
Gelatin	-	-	-	+	+
Glycyl-L-Proline	-	-	-	-	+
L-Alanine	-	-	-	+	+
L-Arginine	-	-	-	-	+
L-Aspartic Acid	+	+	+	+	+
L-Glutamic Acid	-	-	-	-	+
L-Histidine	+	+	+	+	+
L-Pyroglutamic Acid	-	+	-	-	+
L-Serine	-	+	-	+	+
Pectin	+	+	-	+	+
D-Galacturonic Acid	+	+	-	+	+
L-Galactonic Acid Lactone	+	+	-	+	+
D-Gluconic Acid	-	-	-	-	+
D-Glucuronic Acid	+	+	+	+	+
Glucuronamide	+	+	+	+	+
Mucic Acid	-	-	-	-	-
Quinic Acid	-	-	+	-	+
D-Saccharic Acid	-	-	-	+	+
p-Hydroxy-Phenylacetic Acid	-	-	-	-	-
Methyl Pyruvate	-	-	-	-	+
D-Lactic Acid Methyl Ester	-	-	-	+	+
L-Lactic Acid	-	-	-	-	+
Citric Acid	-	-	-	-	+
α-Keto-Glutaric Acid	-	-	-	-	+
D-Malic Acid	-	-	-	-	+
L-Malic Acid	-	-	-	-	+
Bromo-Succinic Acid	-	-	-	-	+
Tween 40	-	+	-	-	+
γ-Amino-Butryric Acid	-	-	-	-	-
α-Hydroxy-Butyric Acid	-	-	-	-	+
β-Hydroxy-D,L-Butyric Acid	-	-	-	-	+
α-Keto-Butyric Acid	-	-	-	-	-
Acetoacetic Acid	+	+	-	-	-
Propionic Acid	-	-	-	-	-
Acetic Acid	-	-	-	-	-
Formic Acid	-	-	-	-	-
Stains: R1T. Duganella sp. R1T; R64T. Duganella sp. R64T; HSC-15S17T. Duganella violaceipulchra HSC-15S17T; R57T. Duganella sp. R57T; FT81WT. Duganella vulcania FT81WT.
All data were obtained from this study.
+, positive; -, negative

## Sheet: Table S7
Table S7 Fatty acid profiles of R1T, R57T, R64T, HSC-15S17T, and FT81WT
Fatty acid	R1T	R64T	HSC-15S17T	R57T	FT81WT
C10:0	tr	tr	tr	tr	tr
C10:0 3OH	4.7	3.98	3.2	5.34	4.87
C12:0	6.83	6.73	5.97	7.43	6.89
C13:0 iso	tr
C14:1 ω5c	tr
C16:0 iso		tr
C14:0	tr	1.14	tr	tr	tr
C16:1 ω5c	tr
C16:0	37.89	35.63	45.61	35.13	42.51
C17:1 ω7c	tr			tr
C17:0 cyclo	18.26	7.36	12.55	16.54	16.48
C17:0	tr
C18:0	tr	tr	tr	tr
C19:0 iso		tr
C20:0	tr	tr
Summed Feature 3*	26.95	41.1	28.42	30.32	25.33
Summed Feature 8*	3.06	2.56	2.08	3.39	2.7
Summed Feature 9*	tr	tr
Stains: R1T. Duganella sp. R1T; R64T. Duganella sp. R64T; HSC-15S17T. Duganella violaceipulchra HSC-15S17T; R57T. Duganella sp. R57T; FT81WT. Duganella vulcania FT81WT.
All data were obtained from this study.
*Summed Feature 3 comprised C16:1 ω7c and/or C16:1 ω6c; *Summed Feature 8 comprised C18:1 ω7c and/or C18:1 ω6c; *Summed Feature 9 comprised C17:1 iso ω9c and/or C16:0 10-methyl I.
tr, Less than 1% of the total fatty acids.
